# Supplementary material for: Population-Based Temporal Trends and Ethnic Disparity in Cervical Cancer Mortality in South Africa (1999–2018): A Join Point and Age–Period–Cohort Regression Analyses
Source: MDPI journal article supplement (doi:10.3390/cancers14246256), 2022-12-19
Supplement: s1 [file s1]

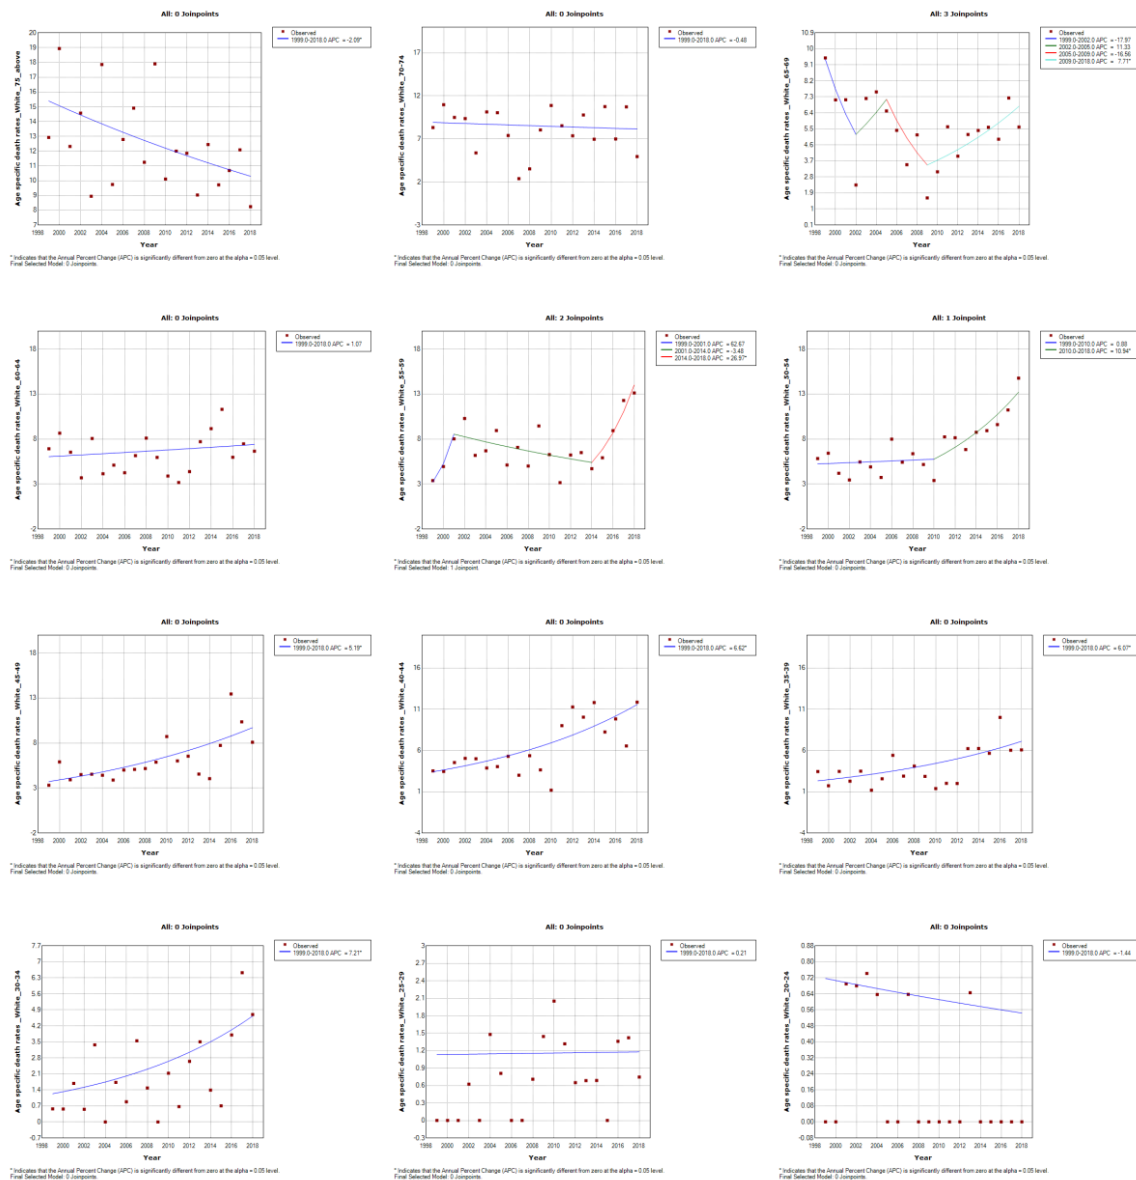

Figure S1. Join point regression of the age specific death rates of cervical cancer among Whites in South Africa (1999 – 2018)

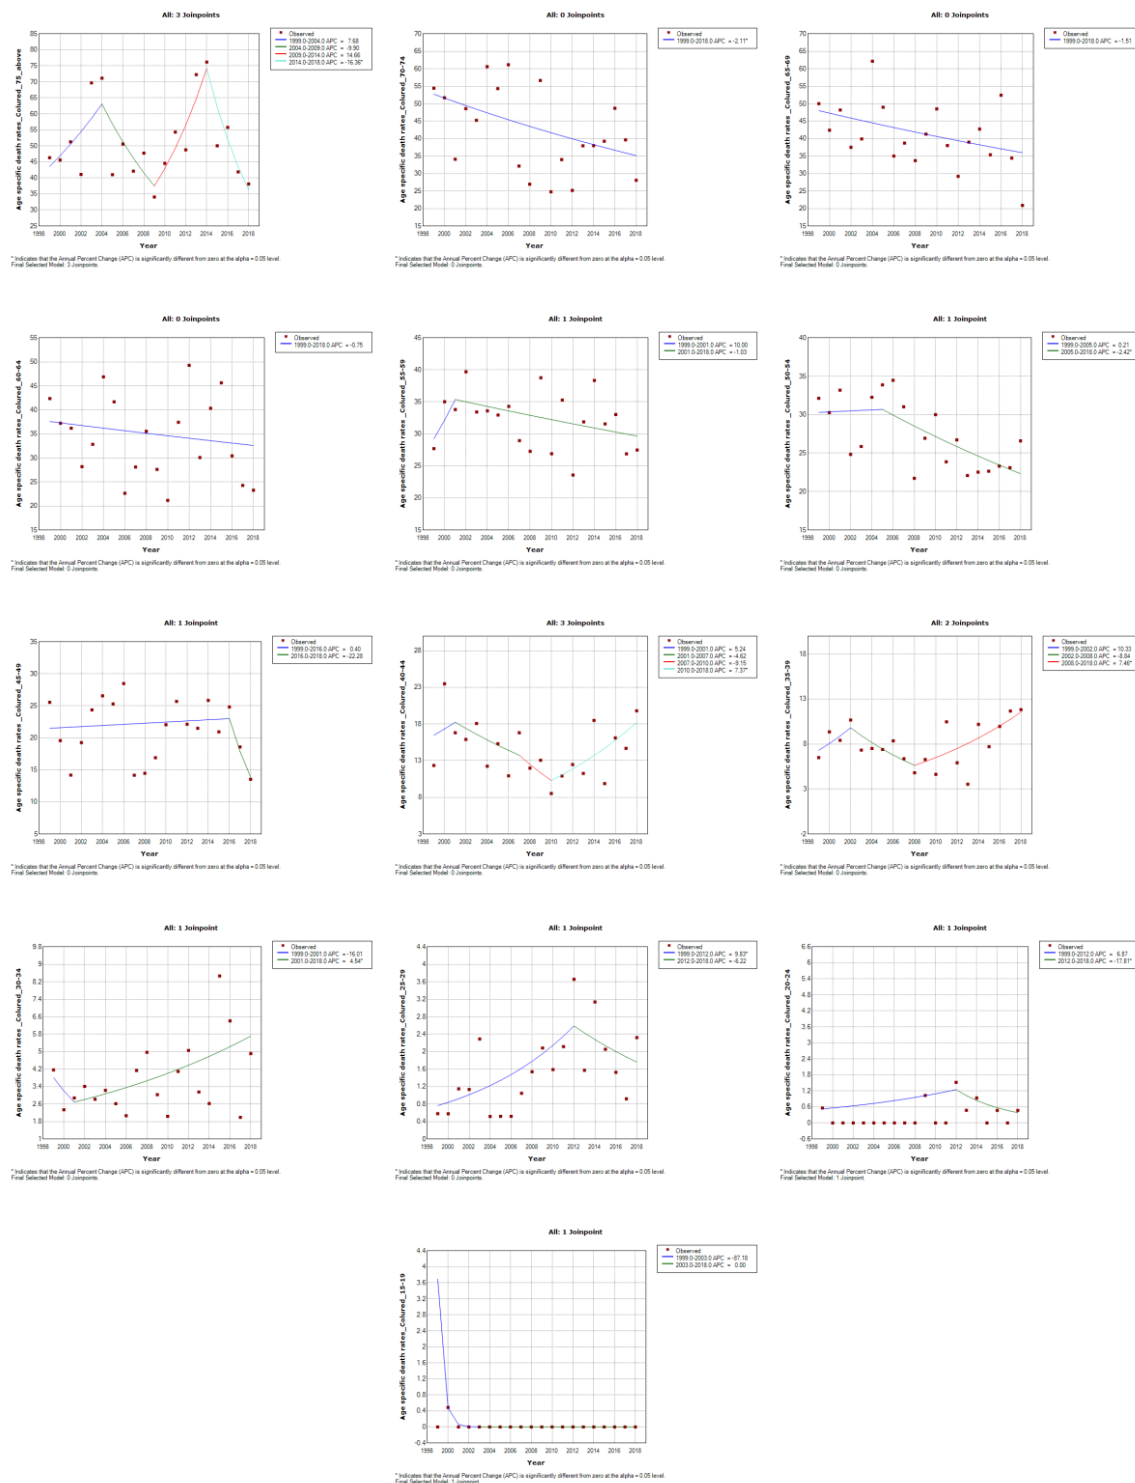

Figure S2. Join point regression of the age specific death rates of cervical cancer among Coloured in South Africa (1999 – 2018)

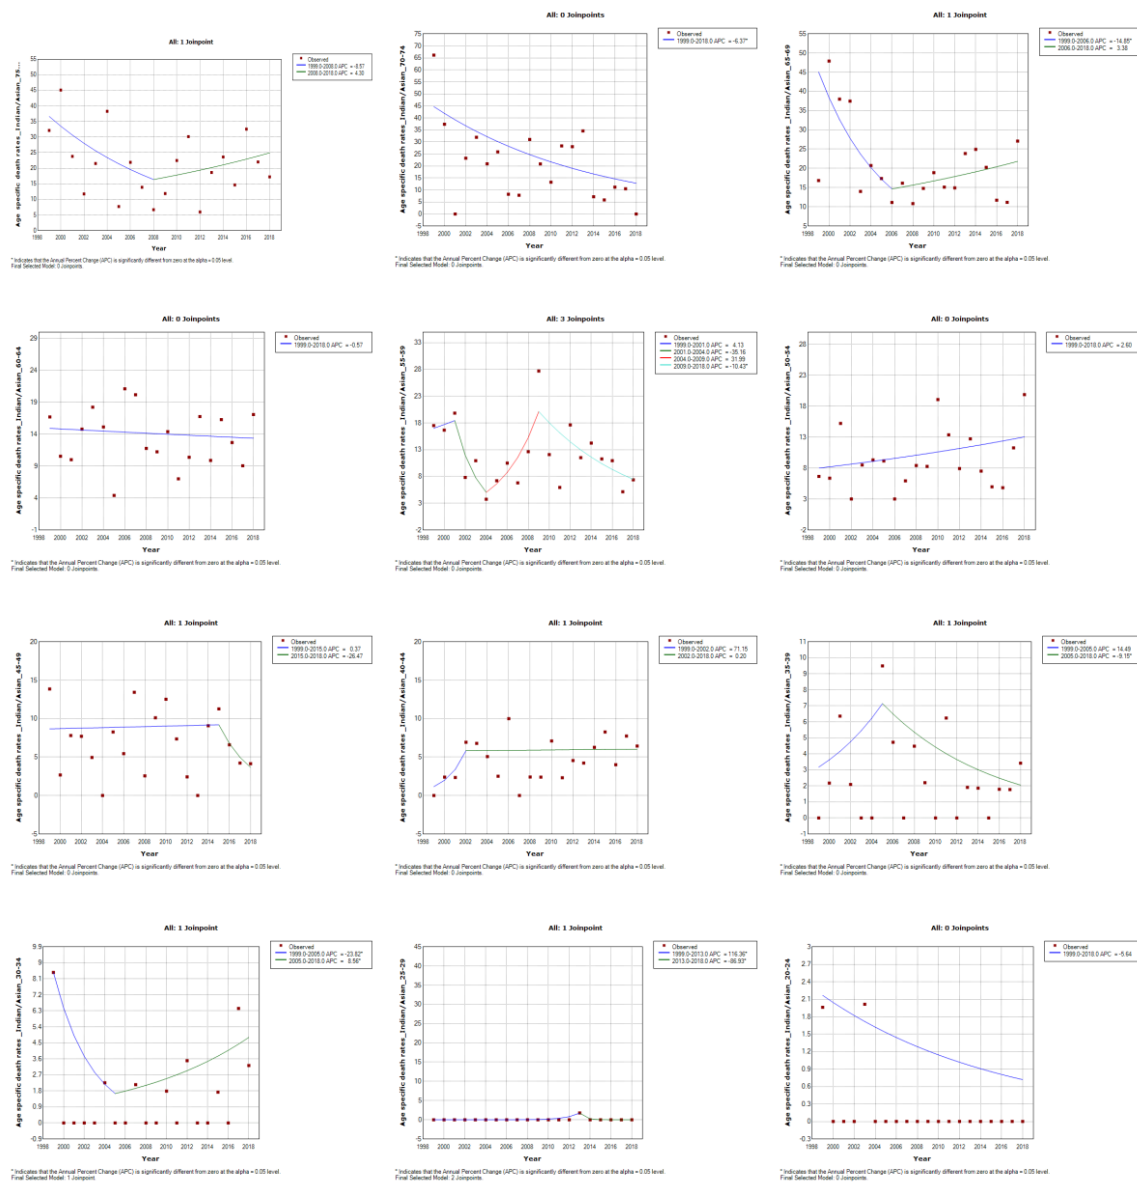

Figure S3. Join point regression of the age specific death rates of cervical cancer among Indian/Asian in South Africa (1999 – 2018)

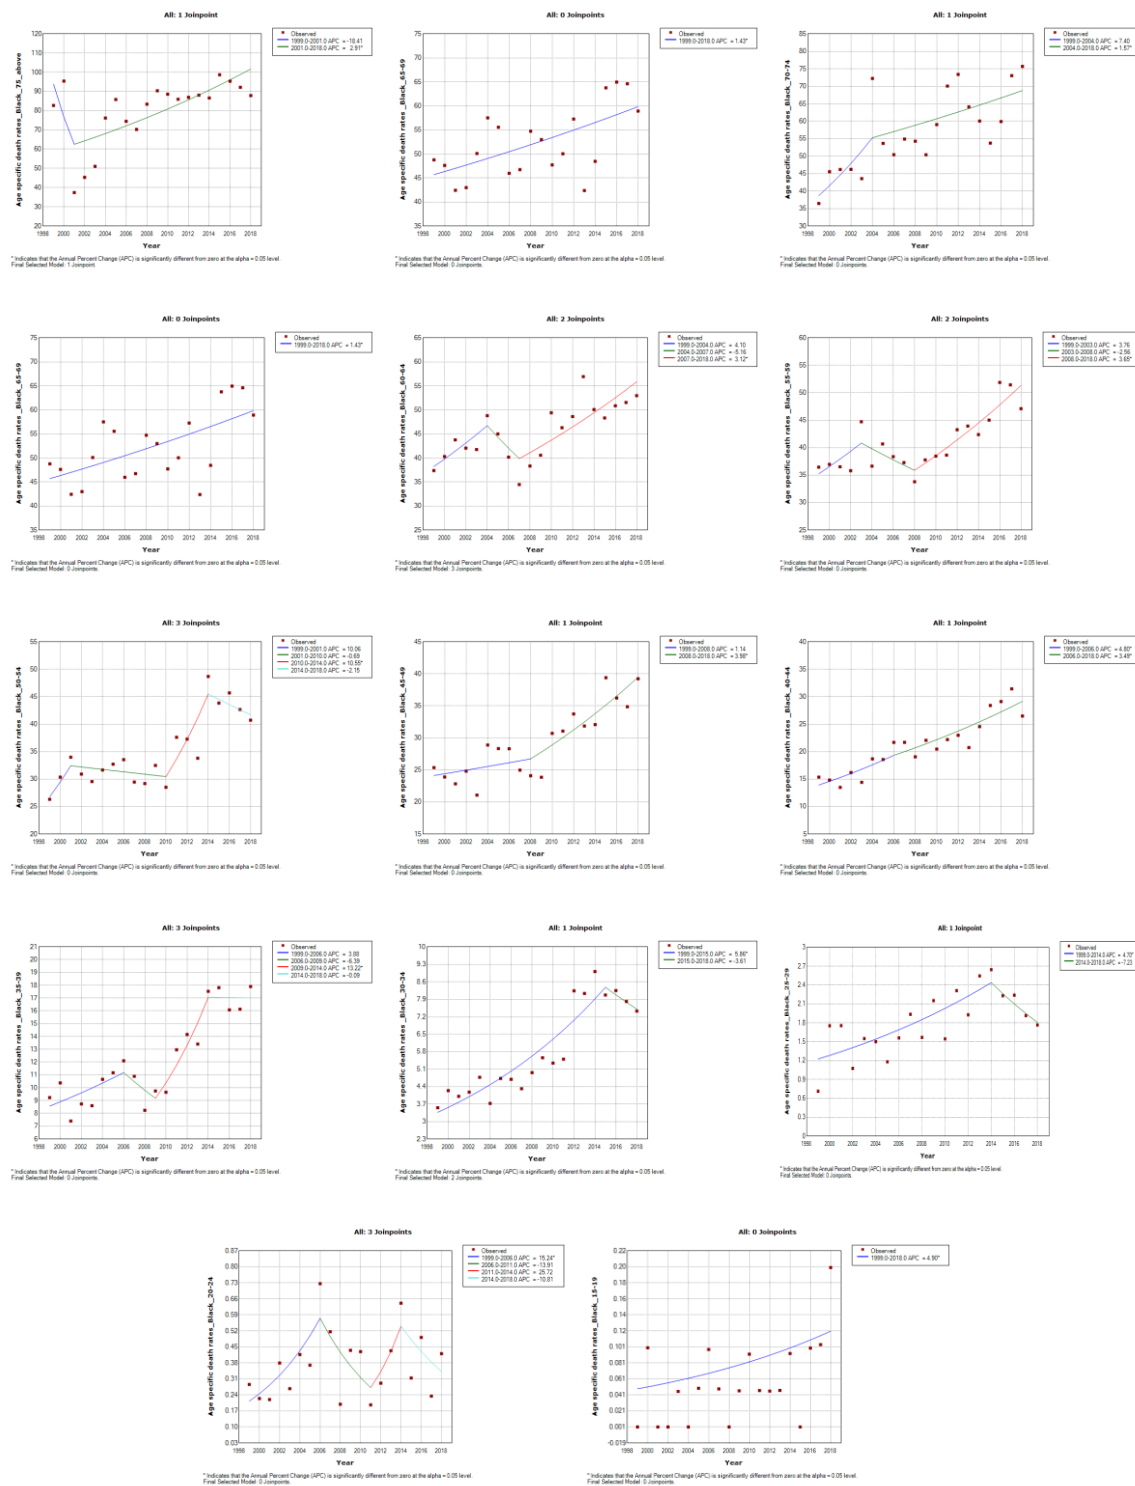

Figure S4. Join point regression of the age specific death rates of cervical cancer among Blacks in South Africa (1999 – 2018)

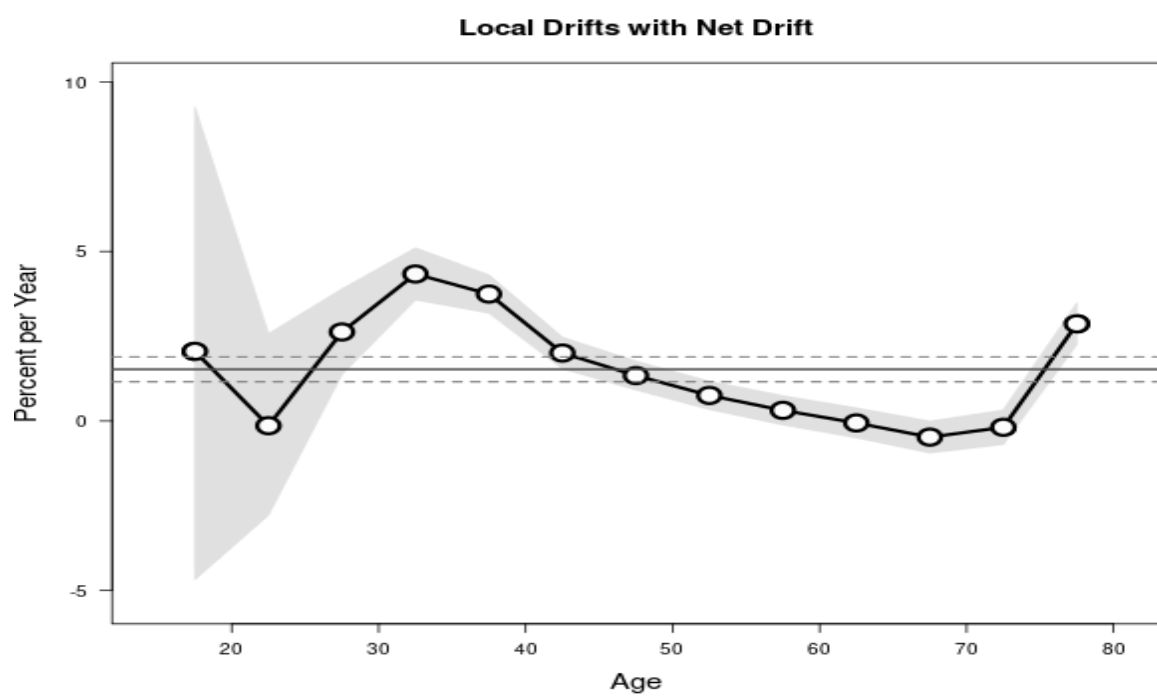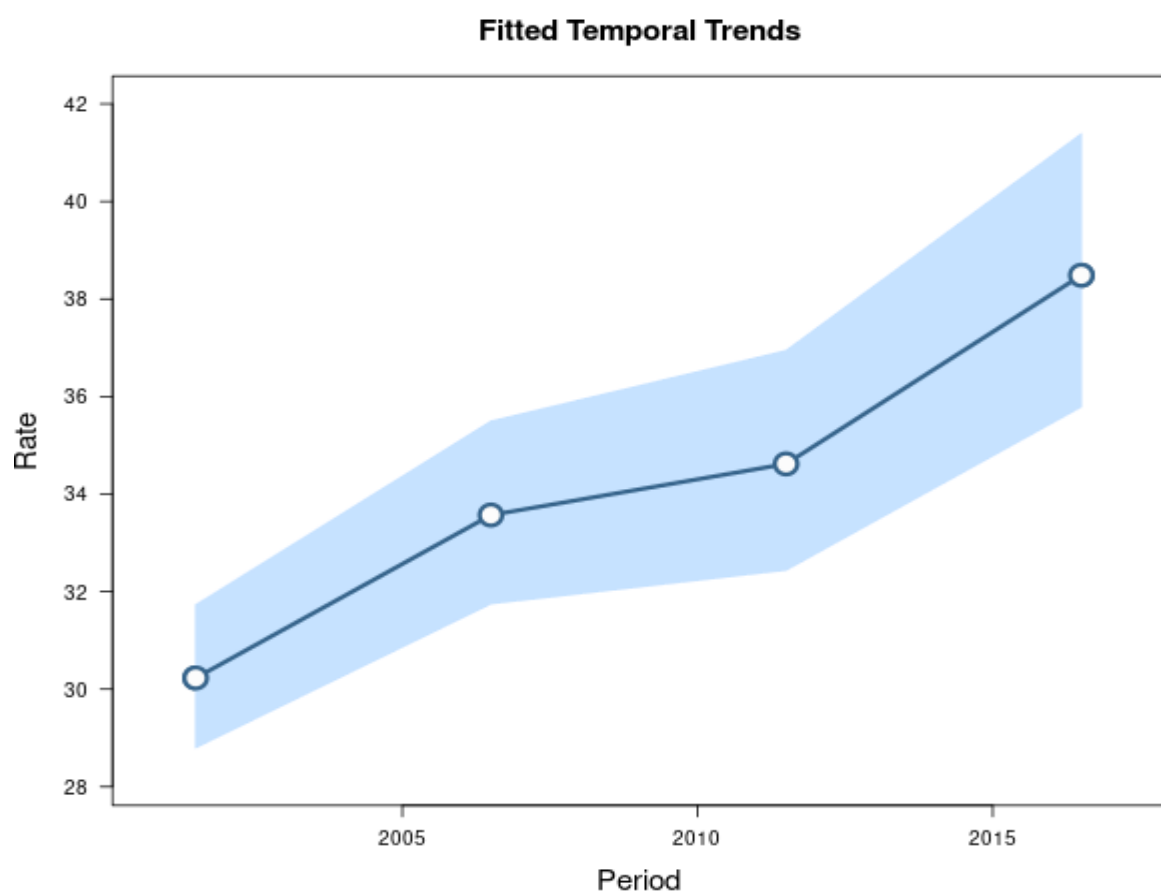

**Longitudinal Age Curve**

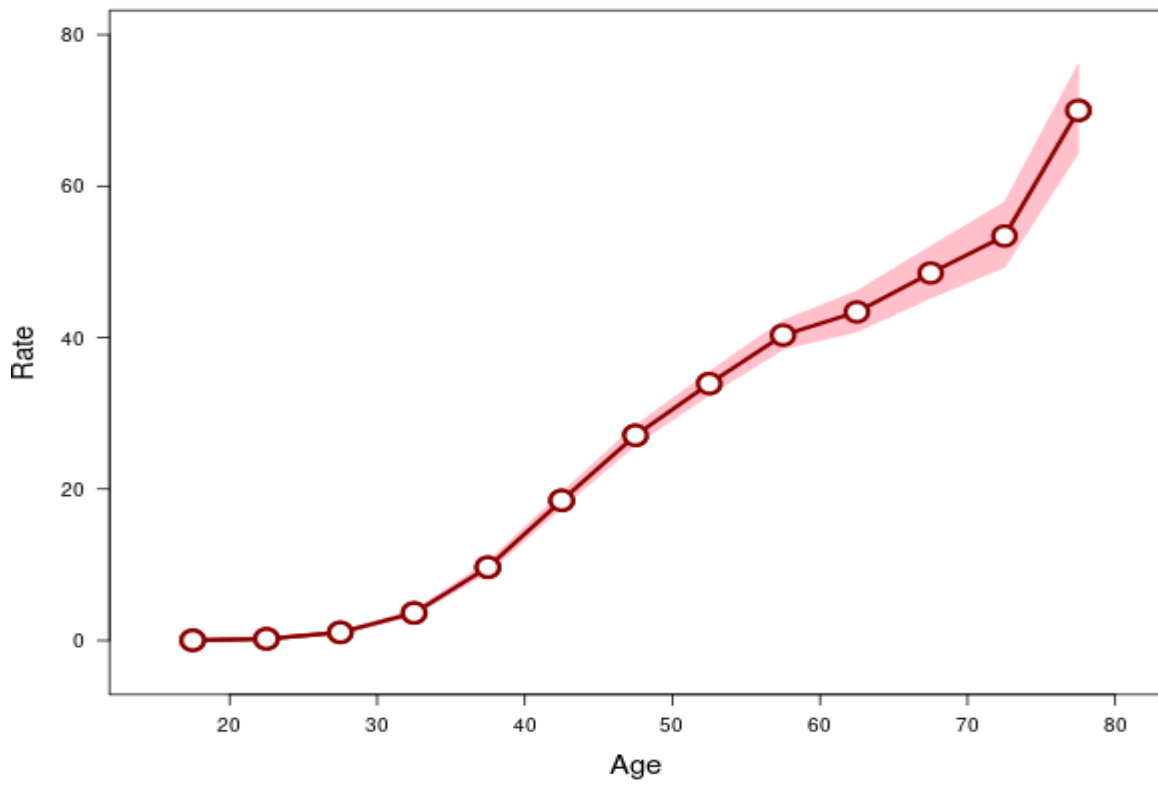

**Cross-Sectional Age Curve**

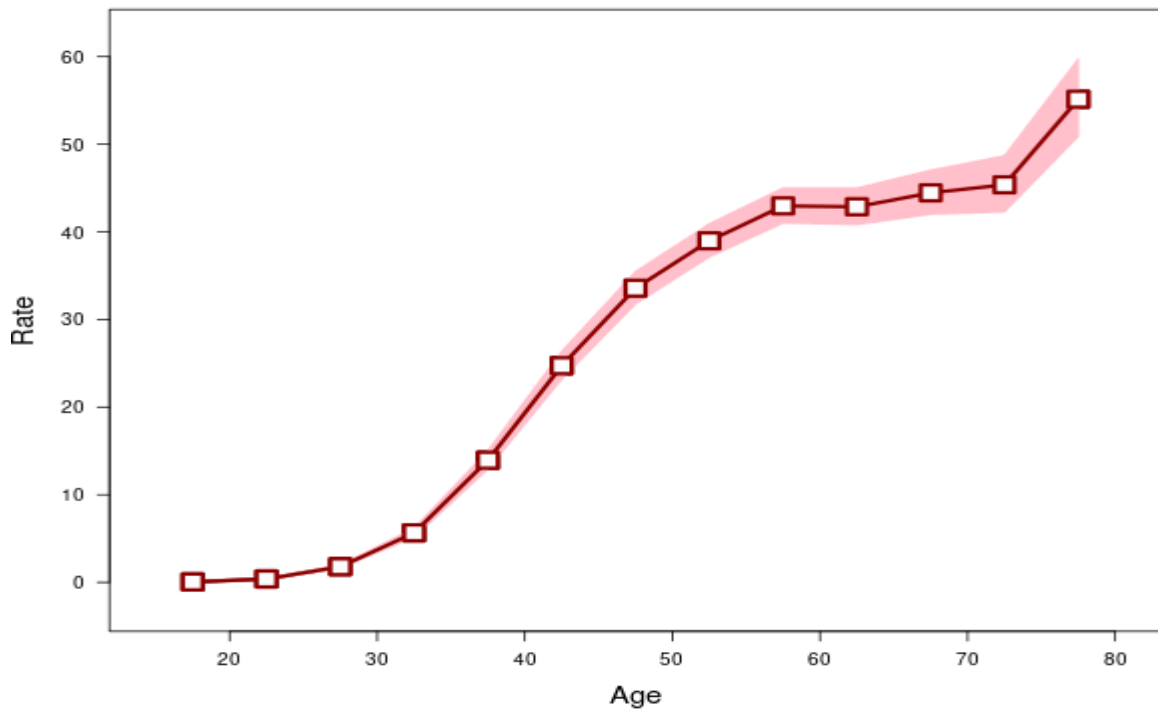

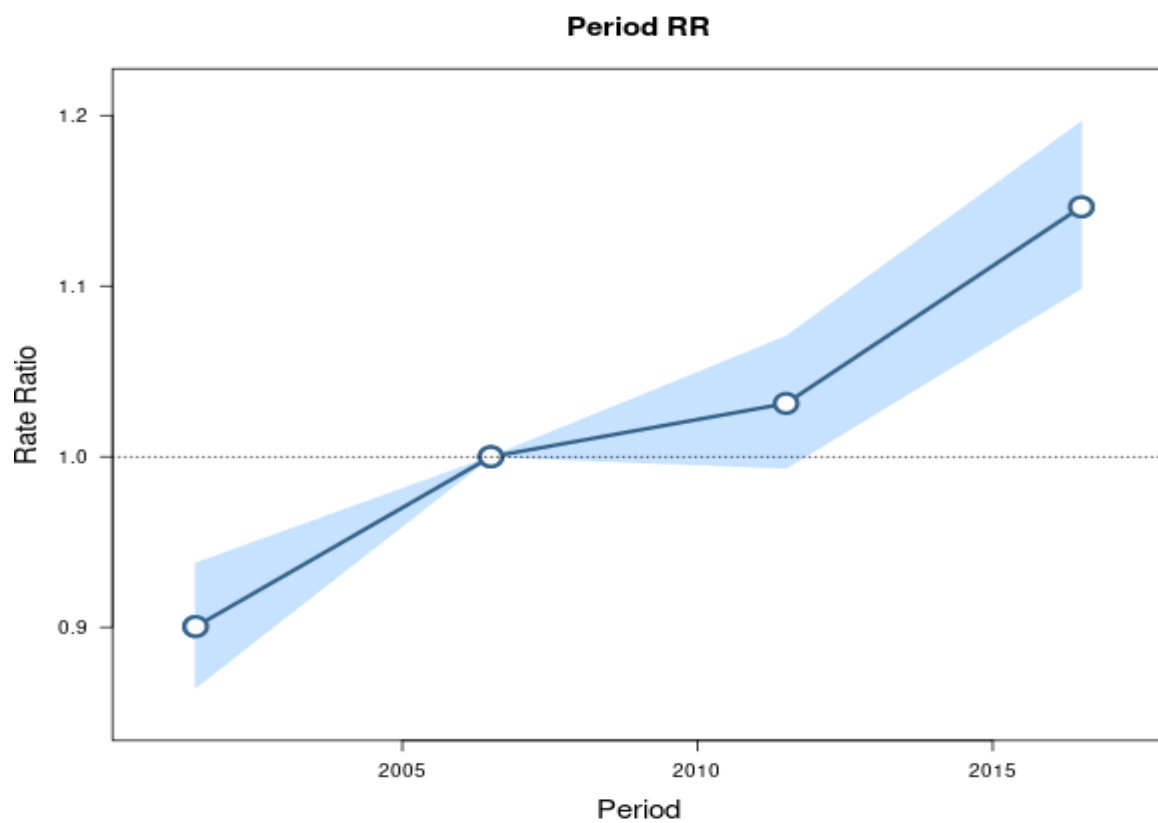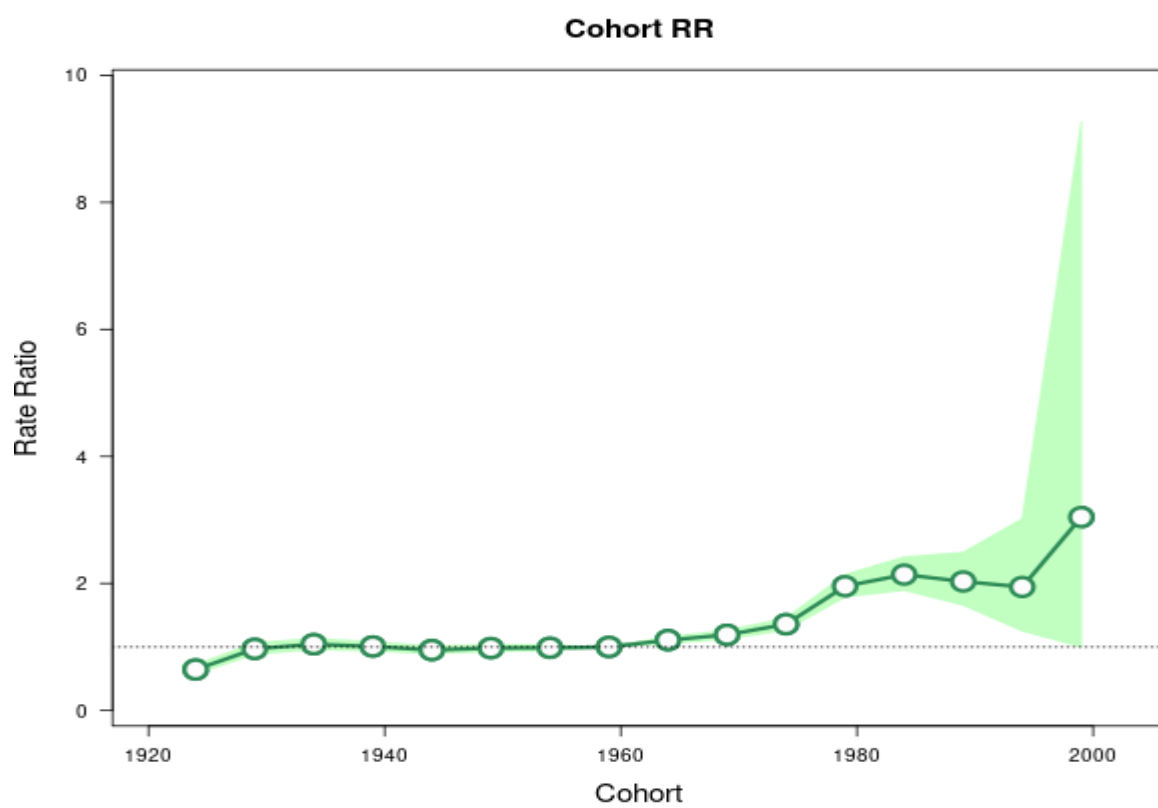

(A)

**Local Drifts with Net Drift**

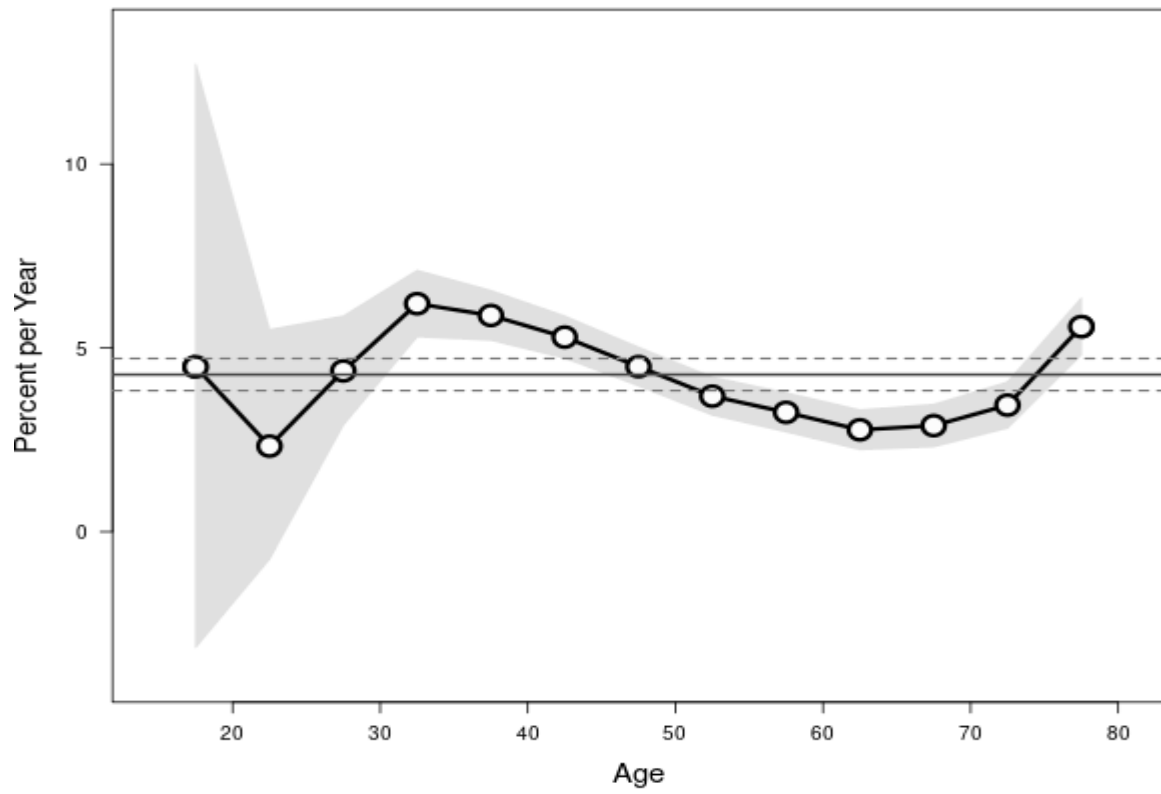

**Fitted Temporal Trends**

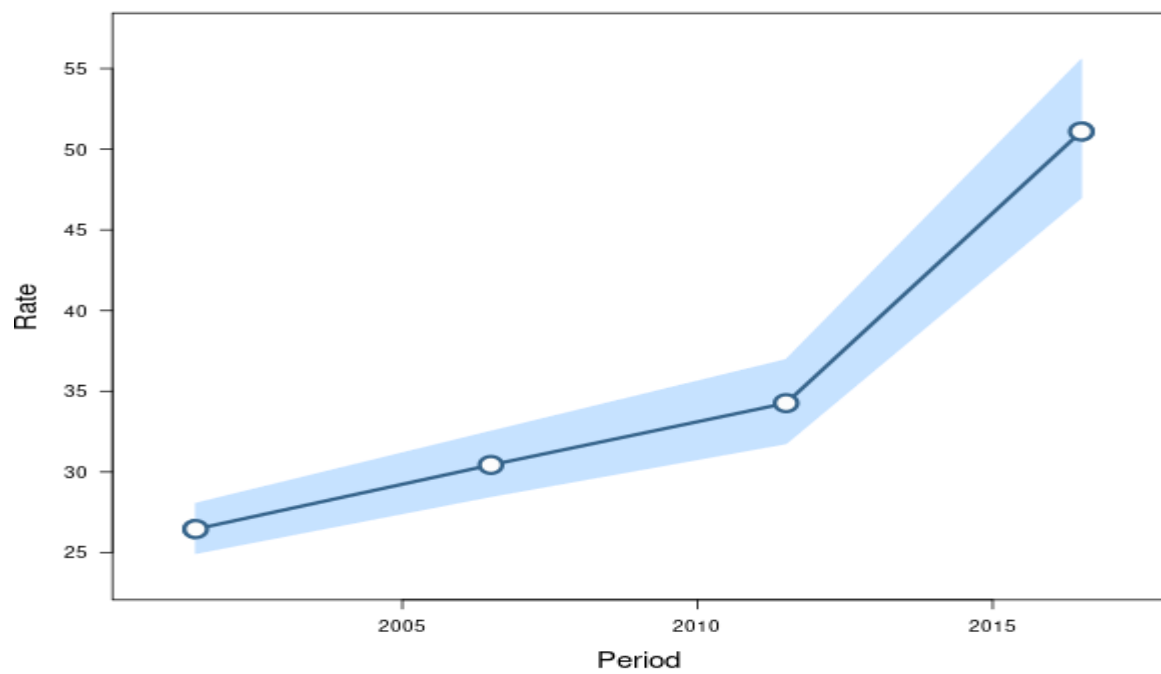



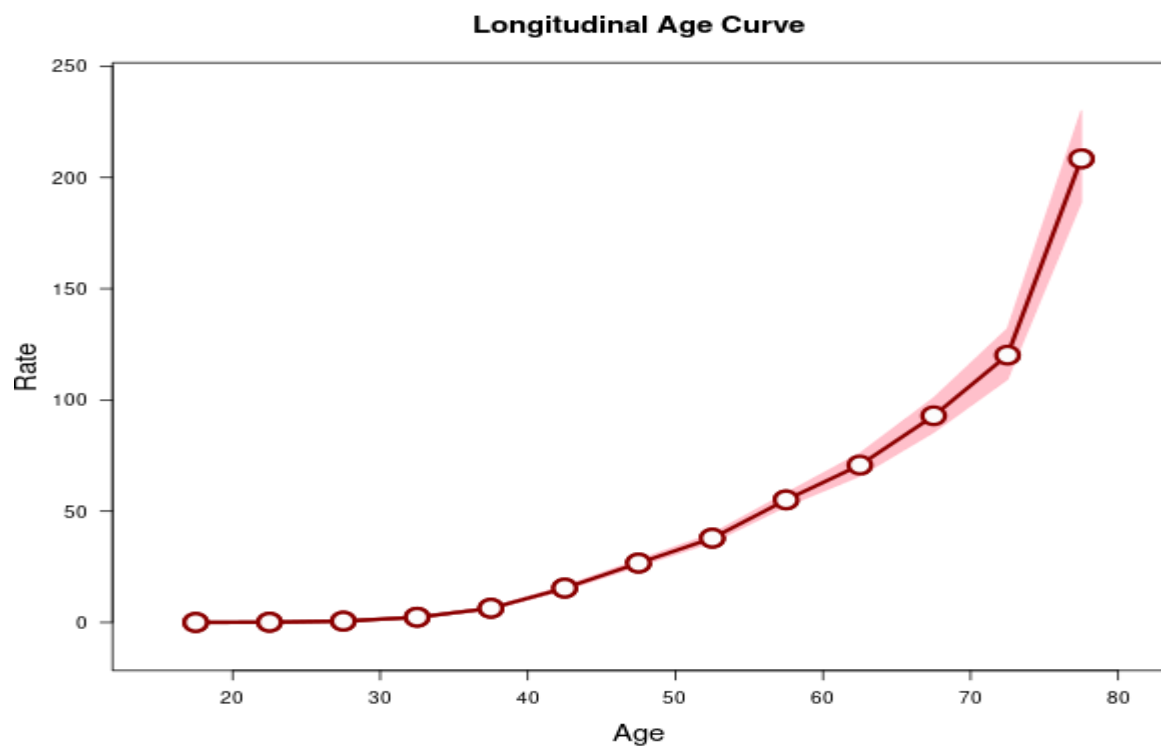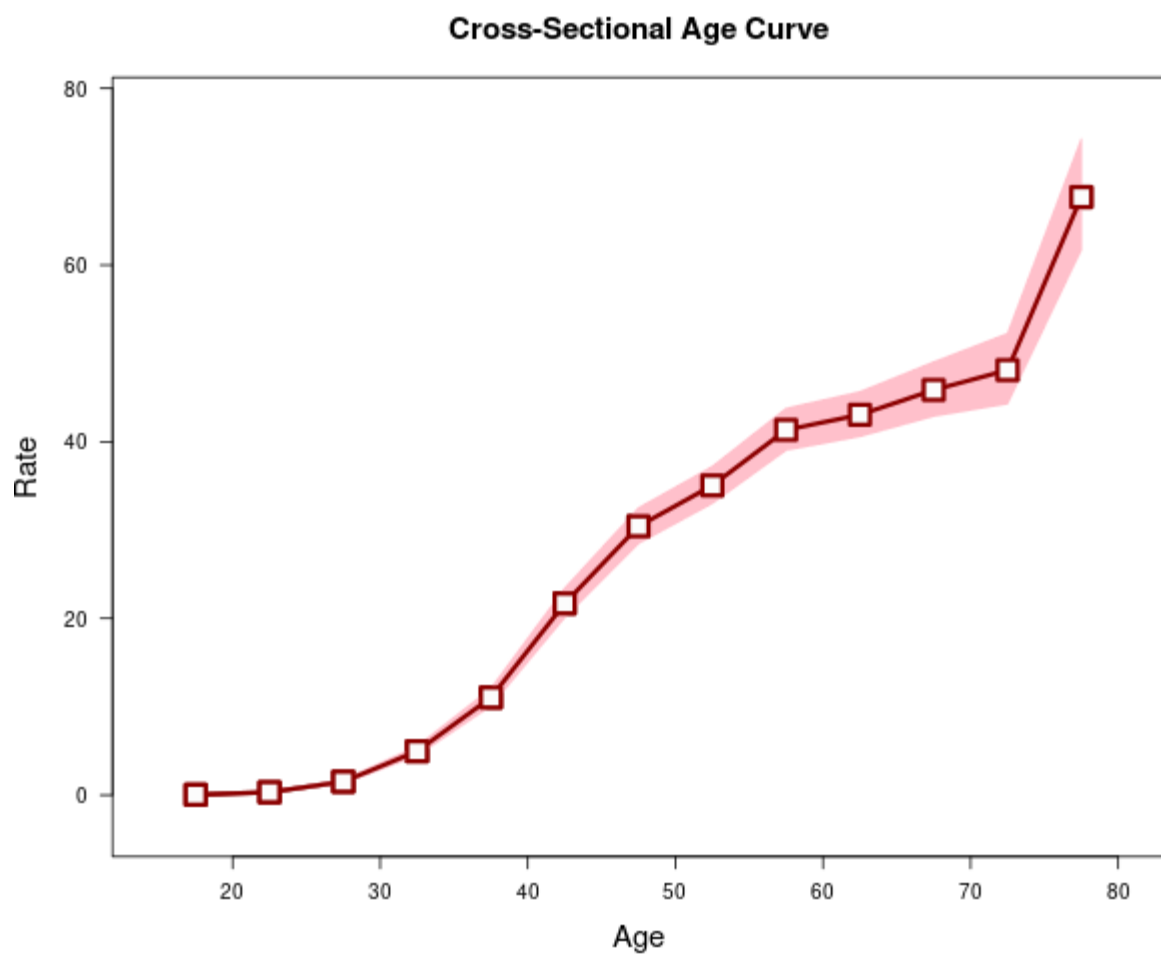

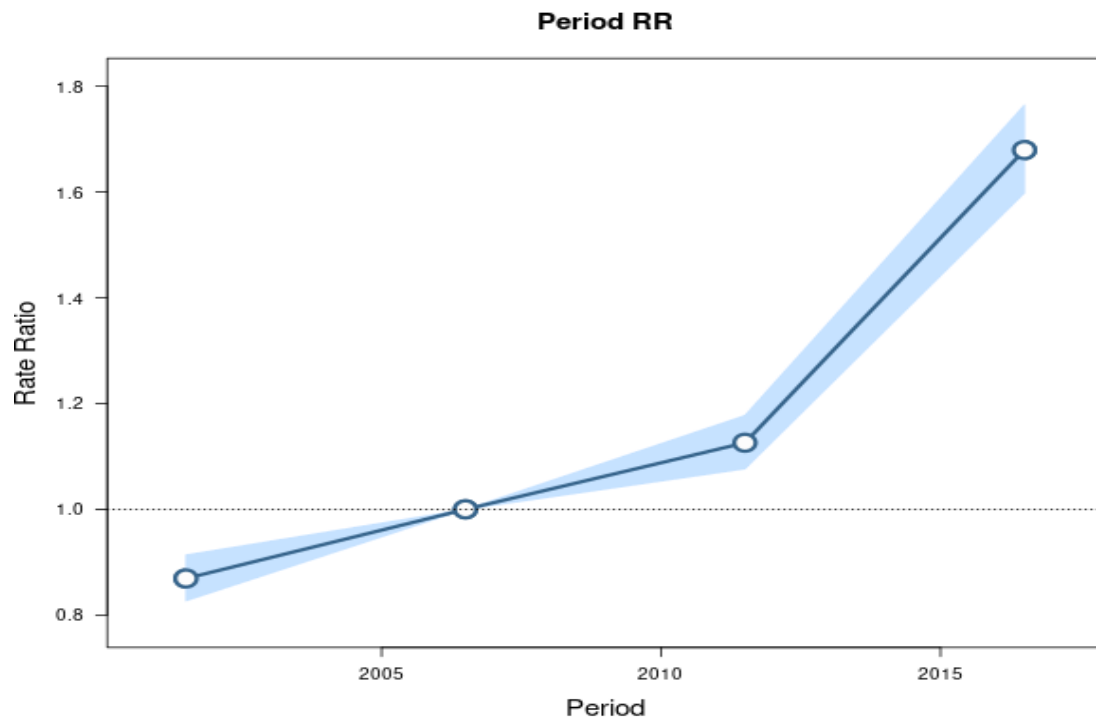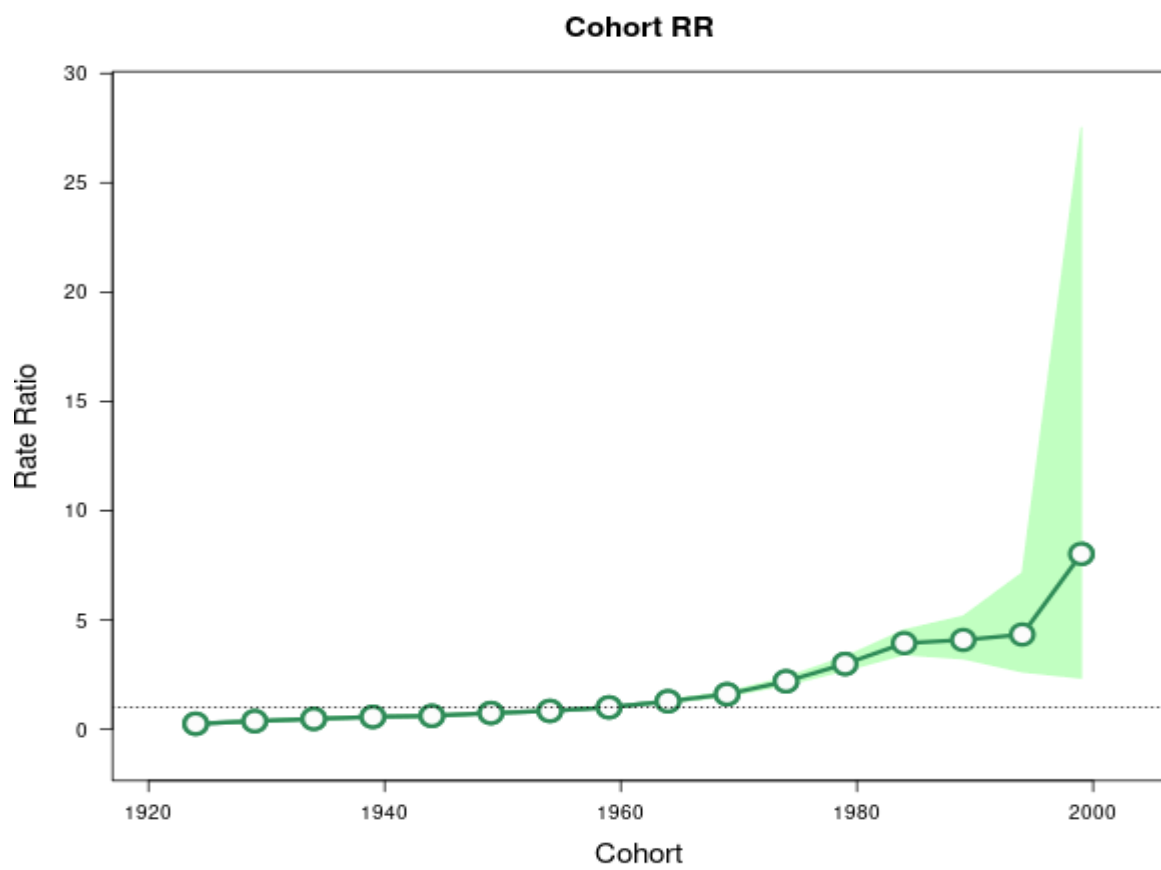

(B)

**Local Drifts with Net Drift**

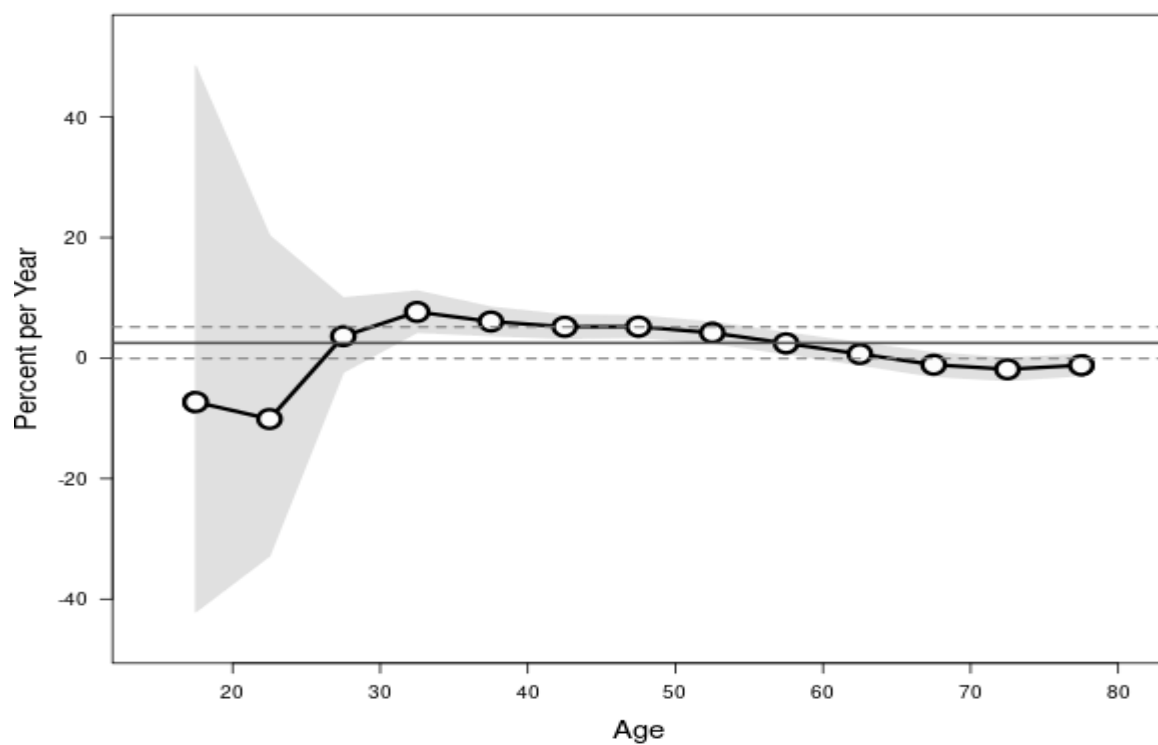

**Fitted Temporal Trends**

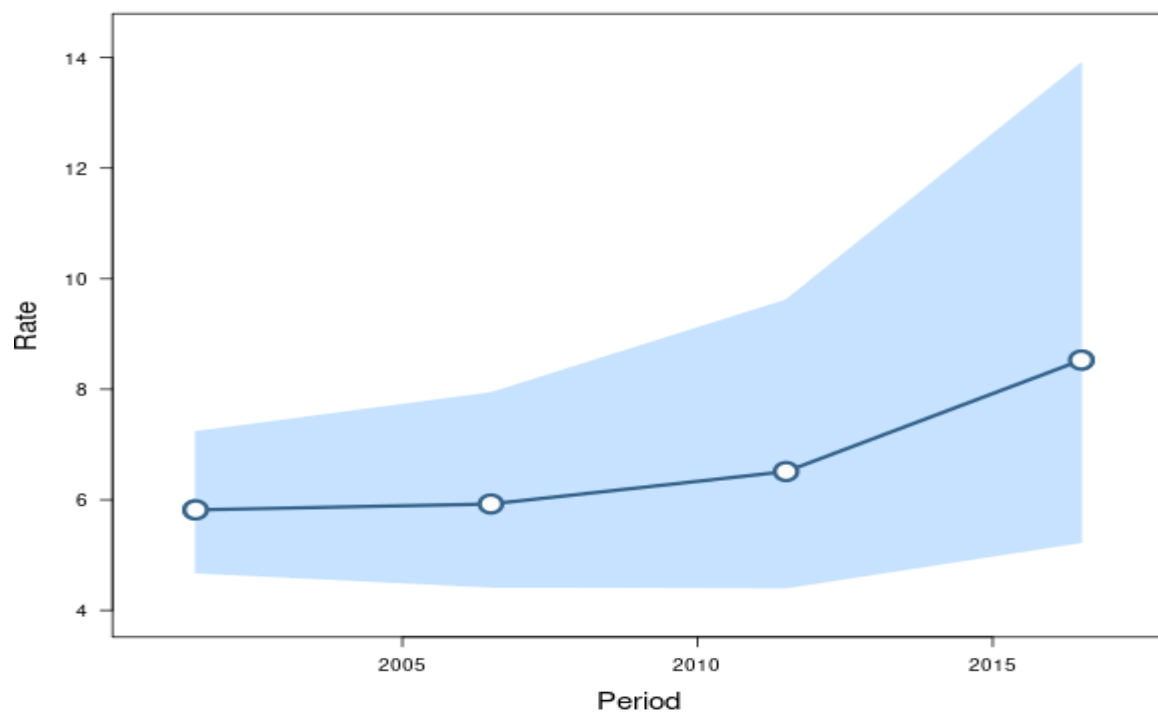

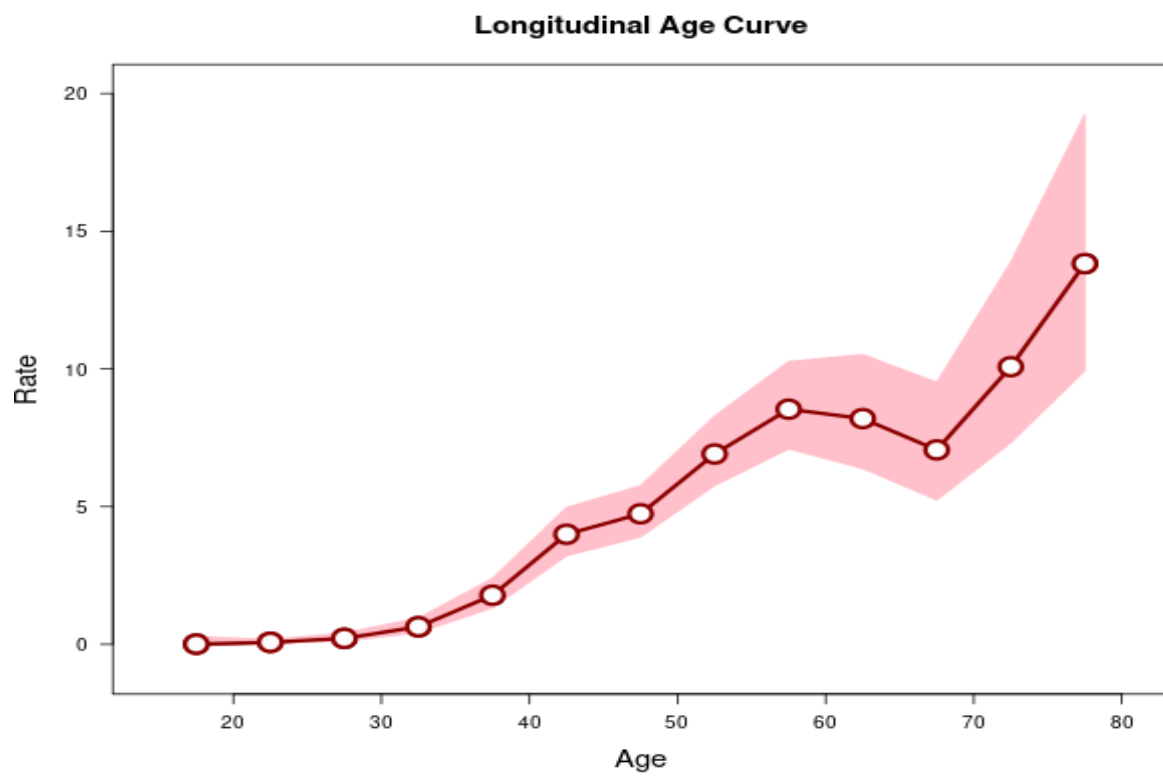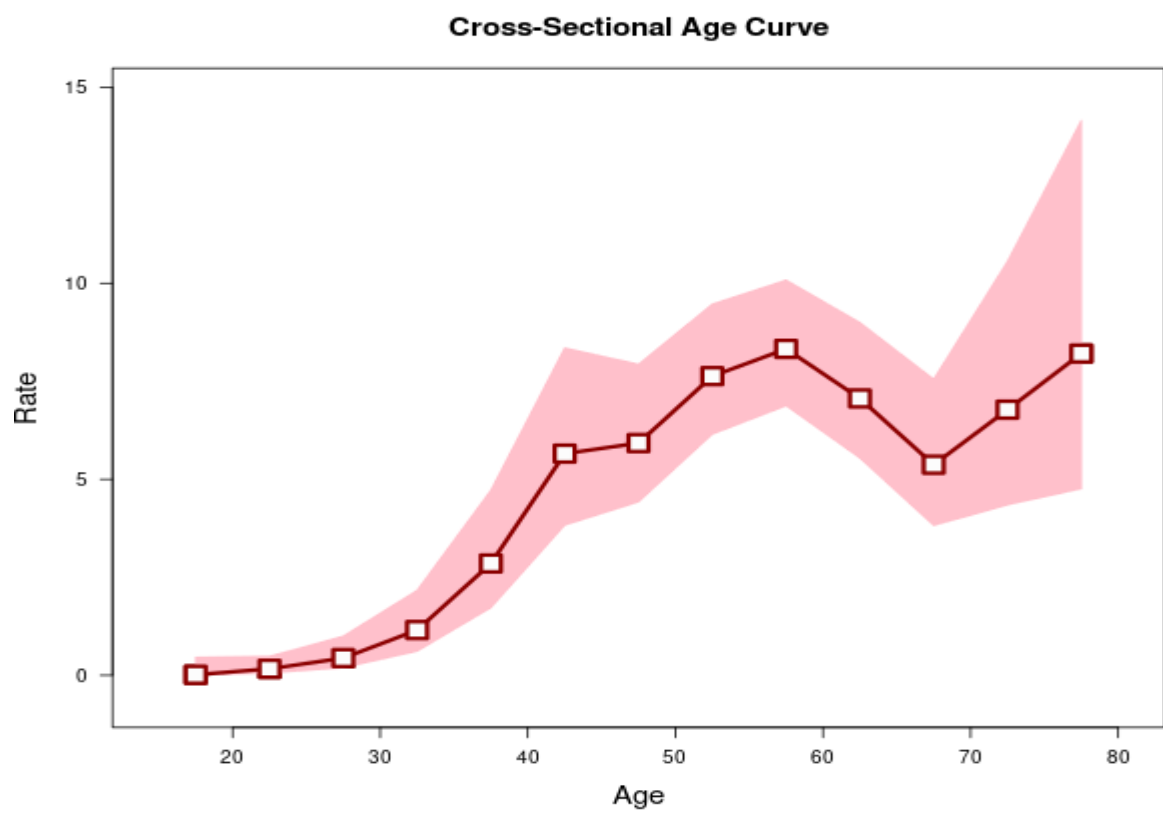

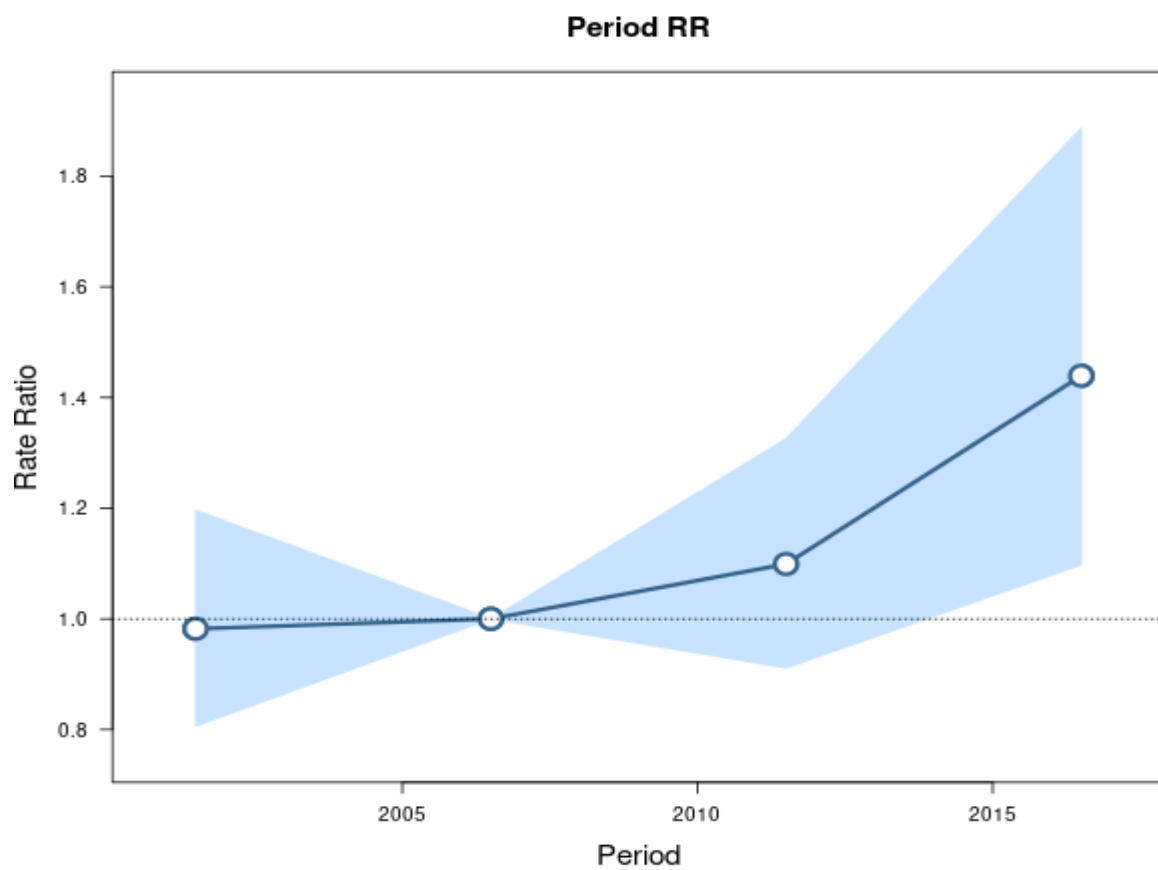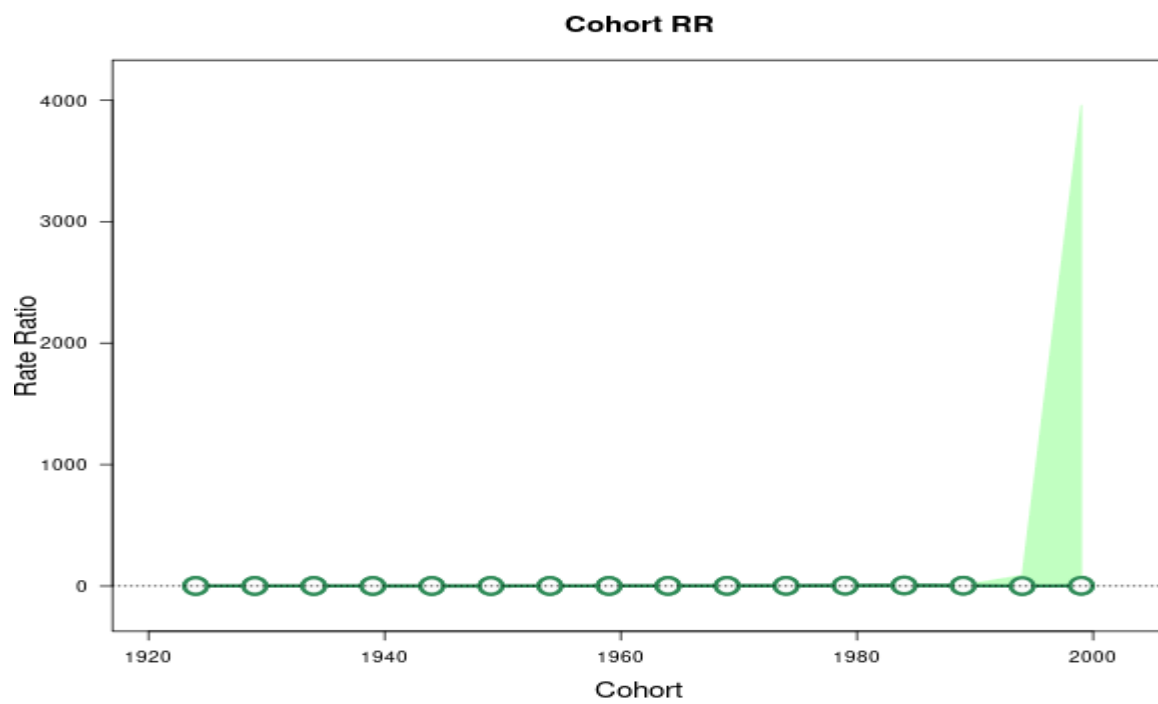

(C)

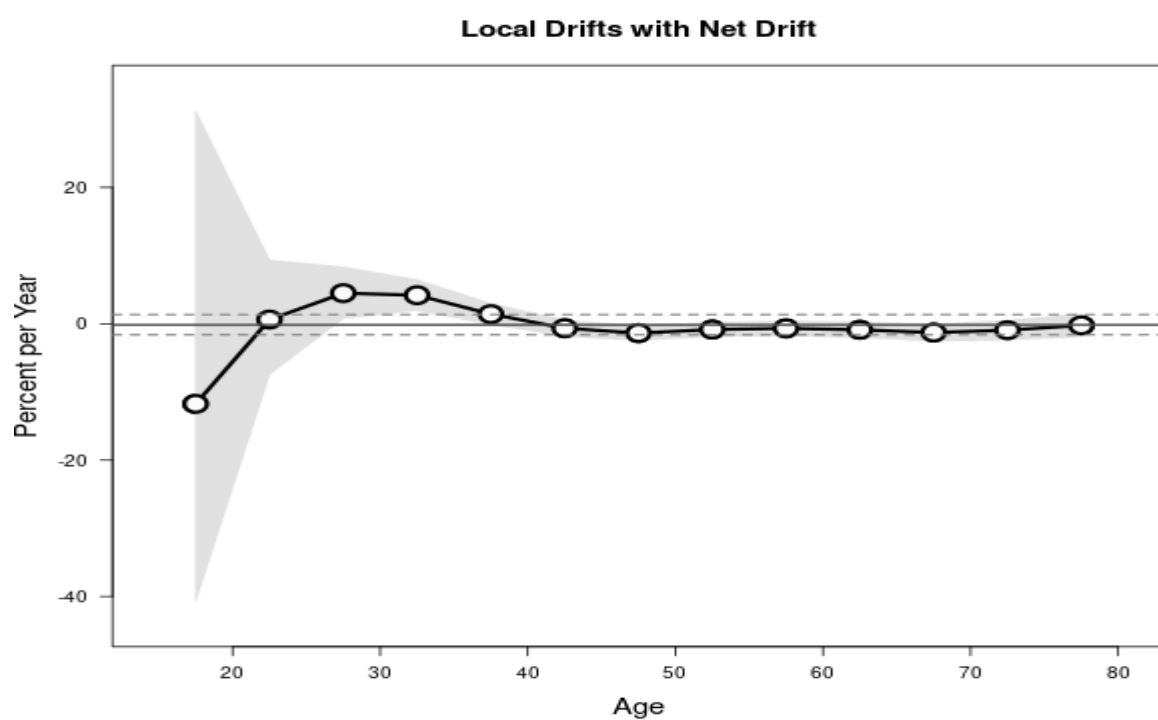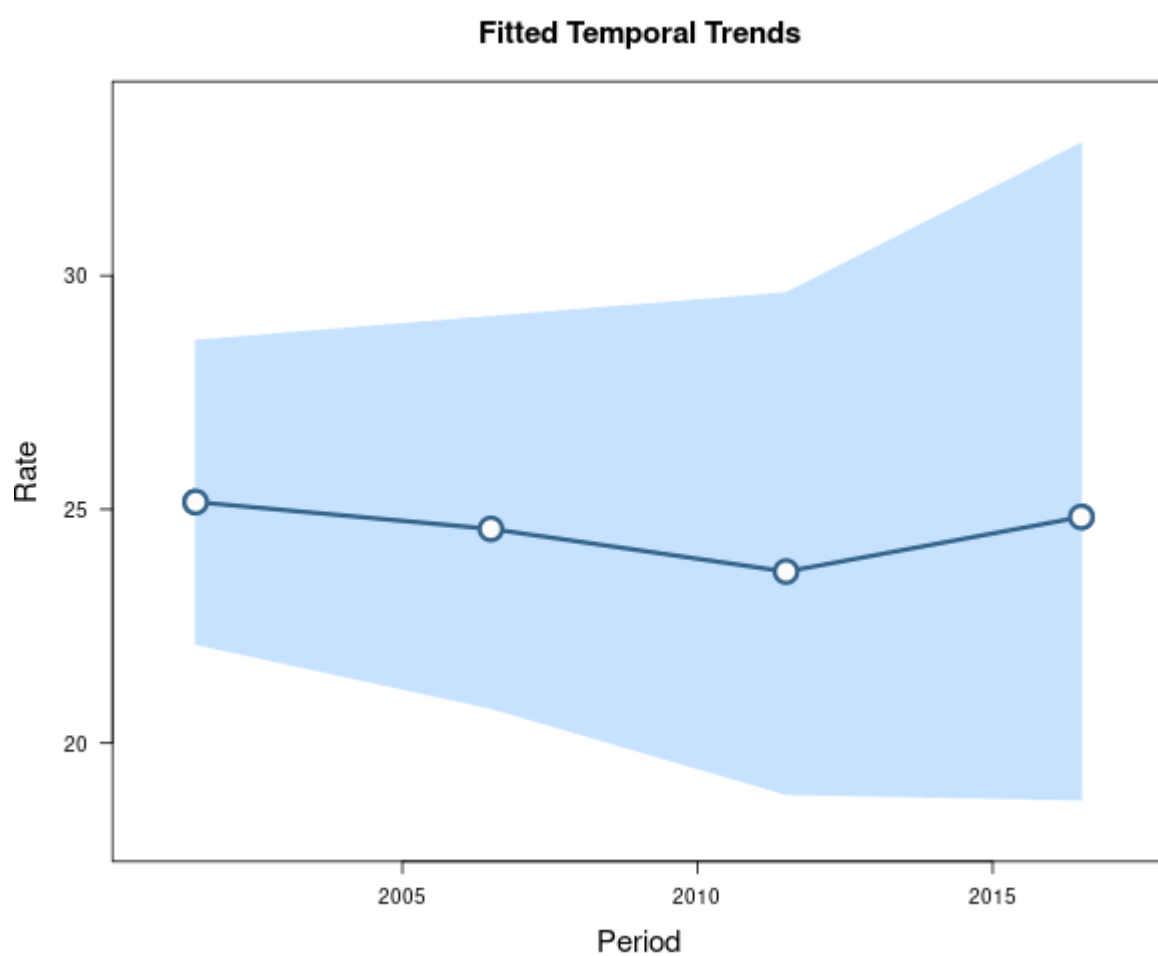

**Longitudinal Age Curve**

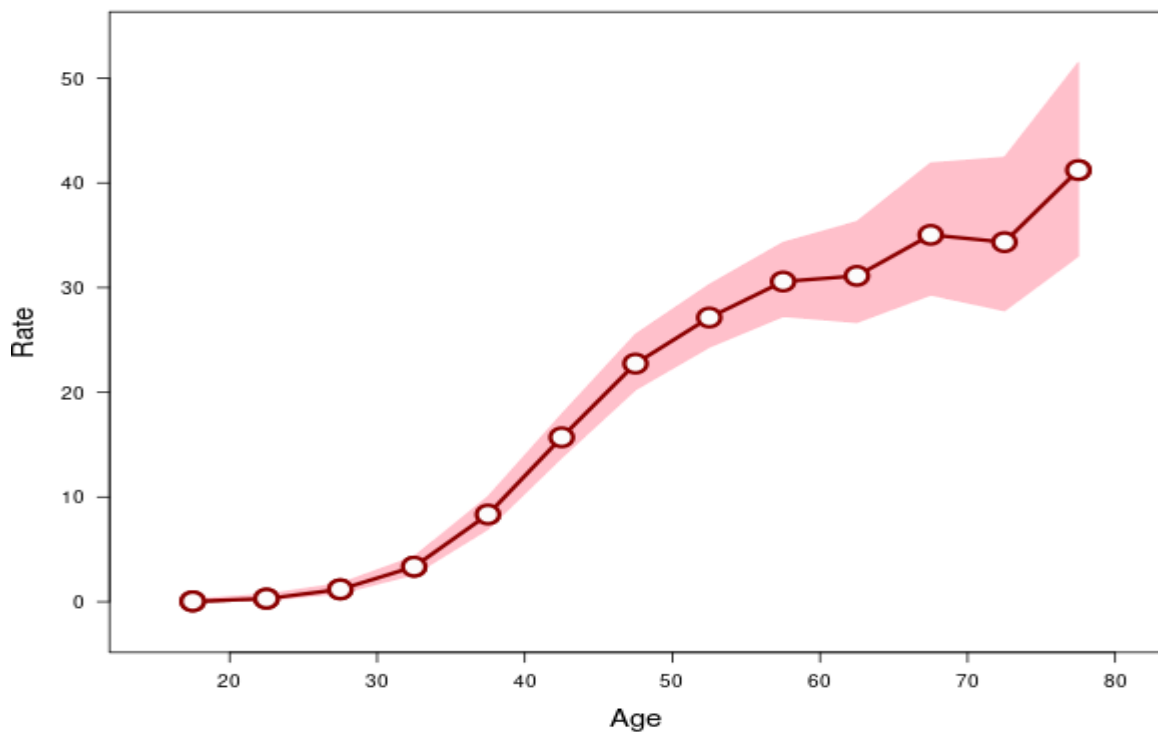

**Cross-Sectional Age Curve**

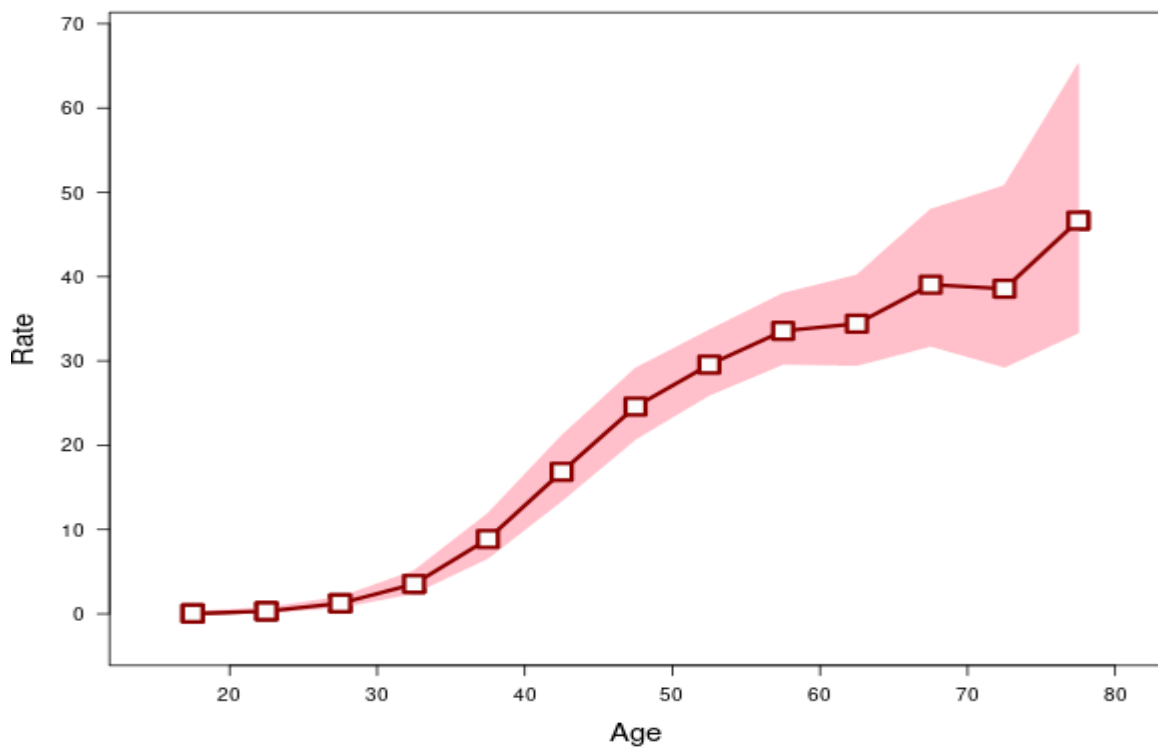

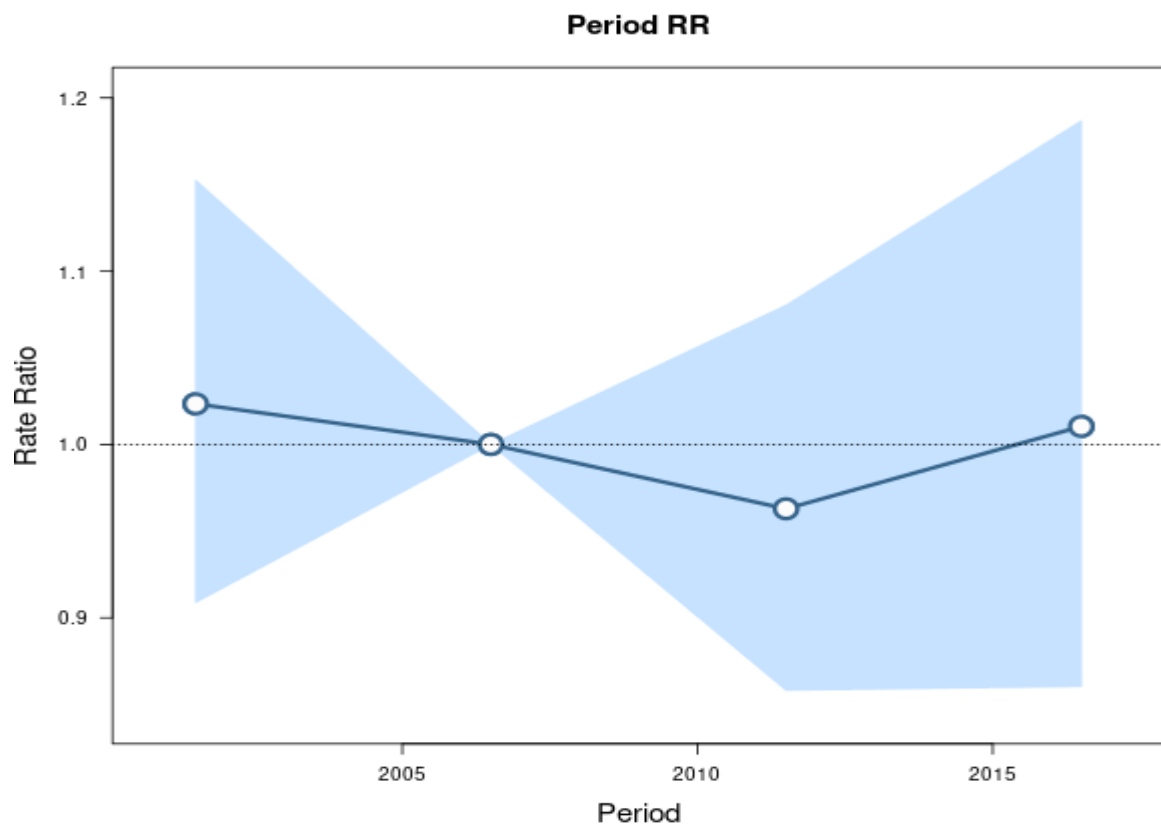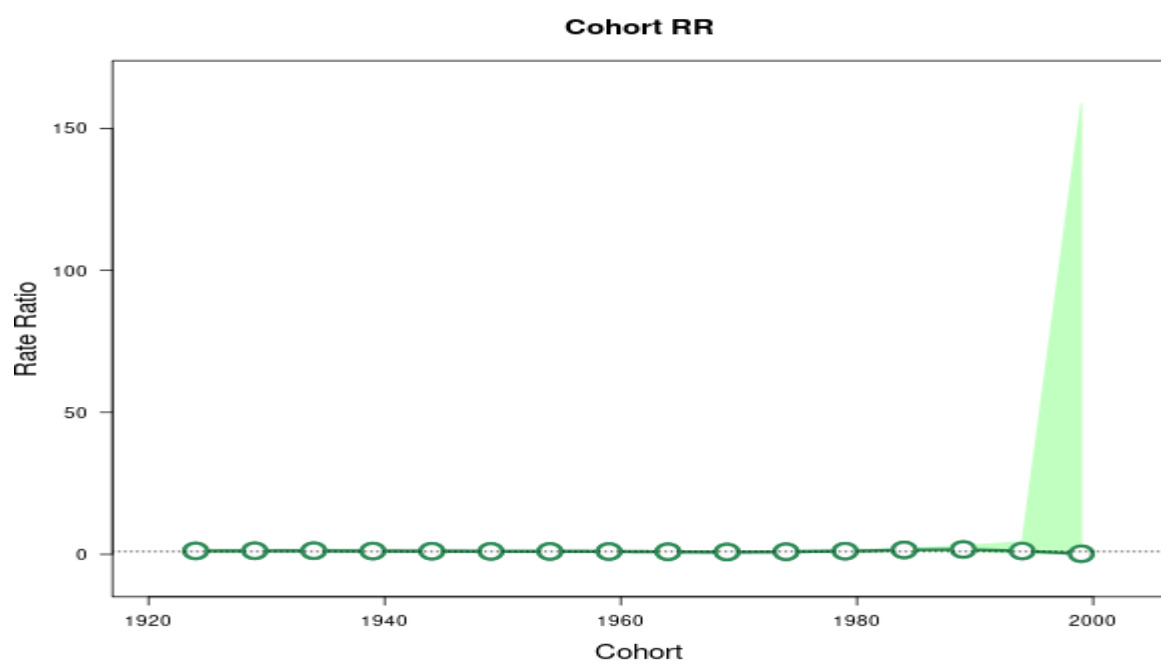



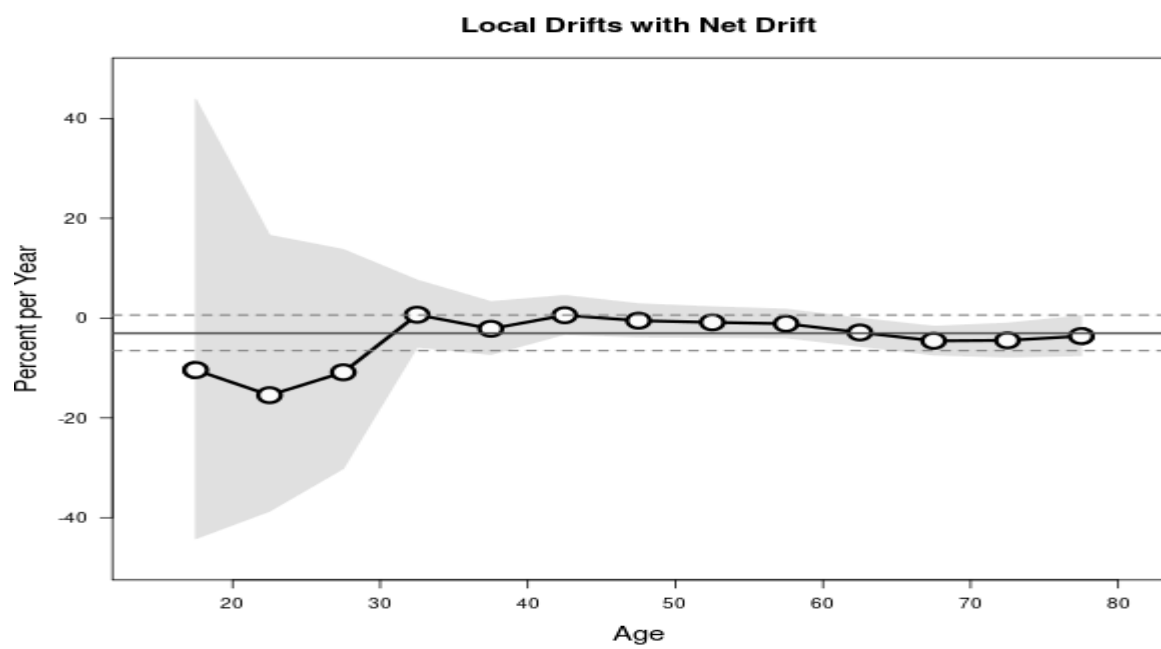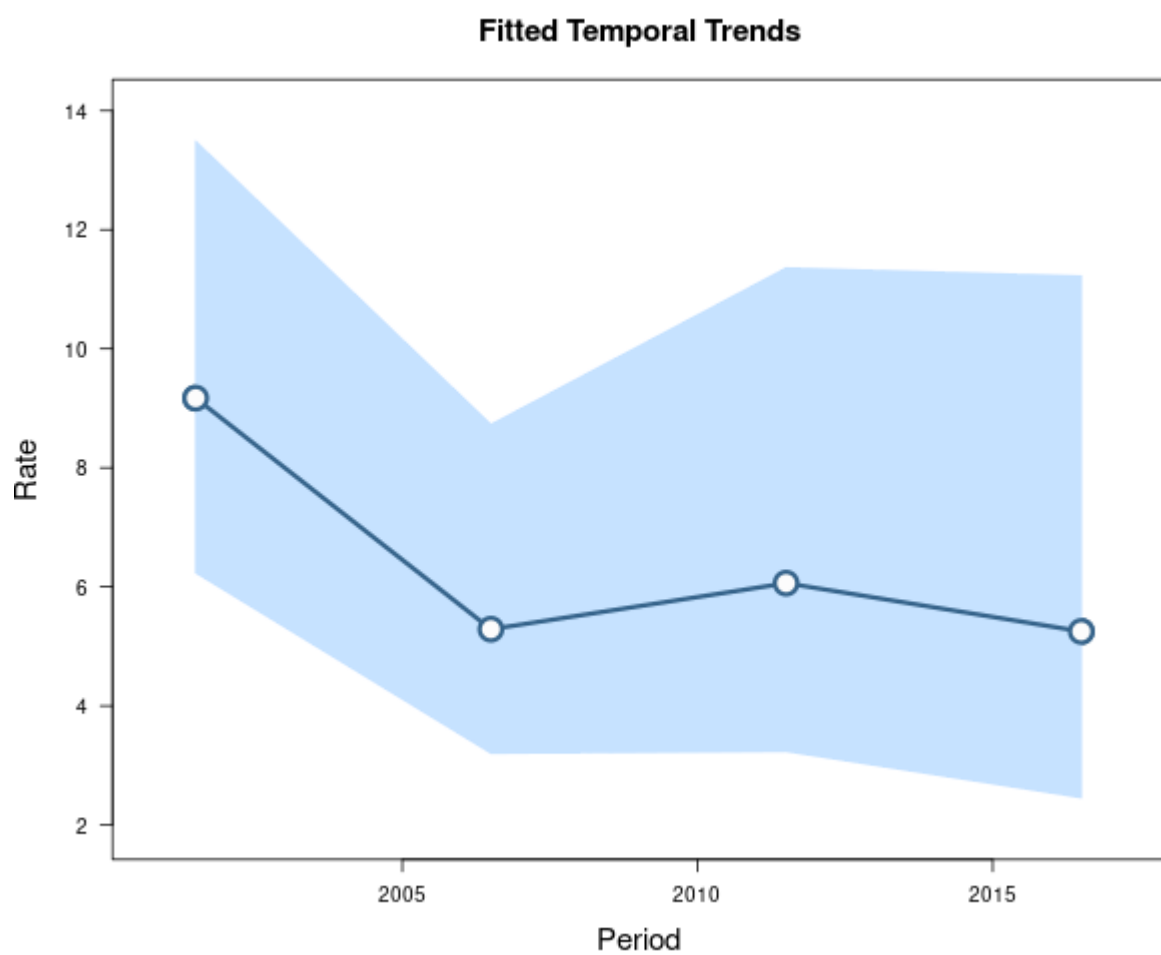

**Longitudinal Age Curve**

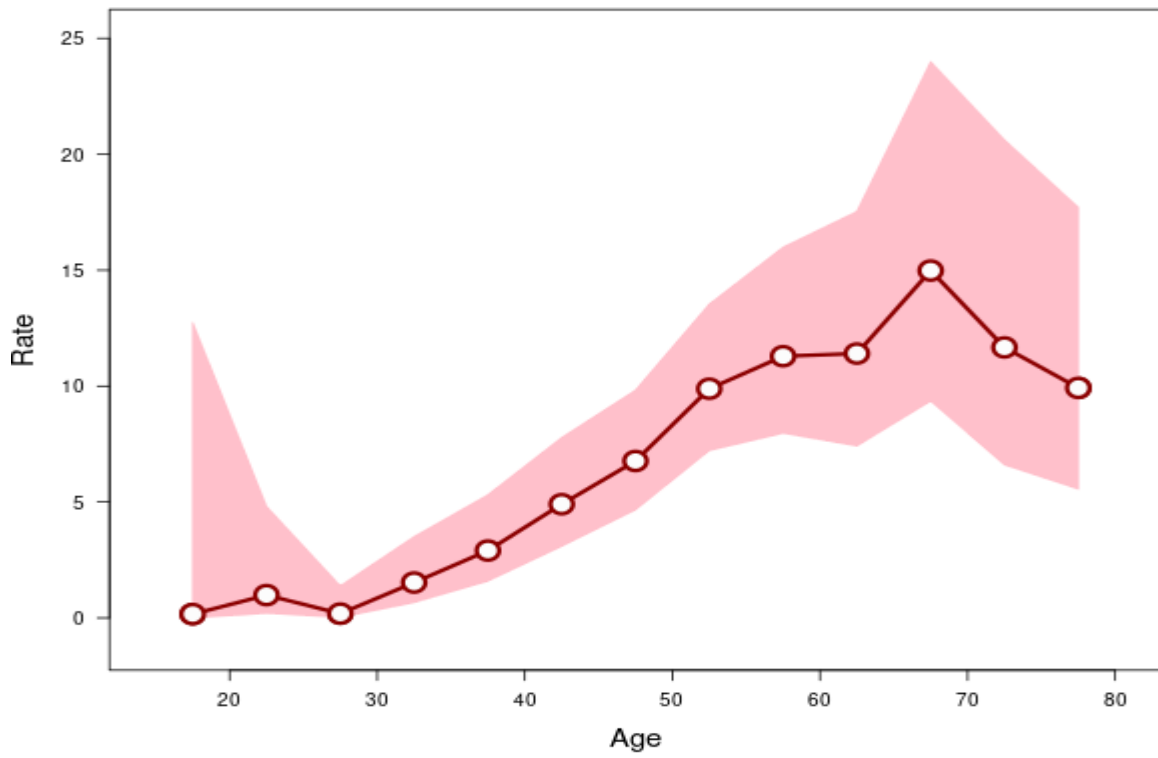

**Cross-Sectional Age Curve**

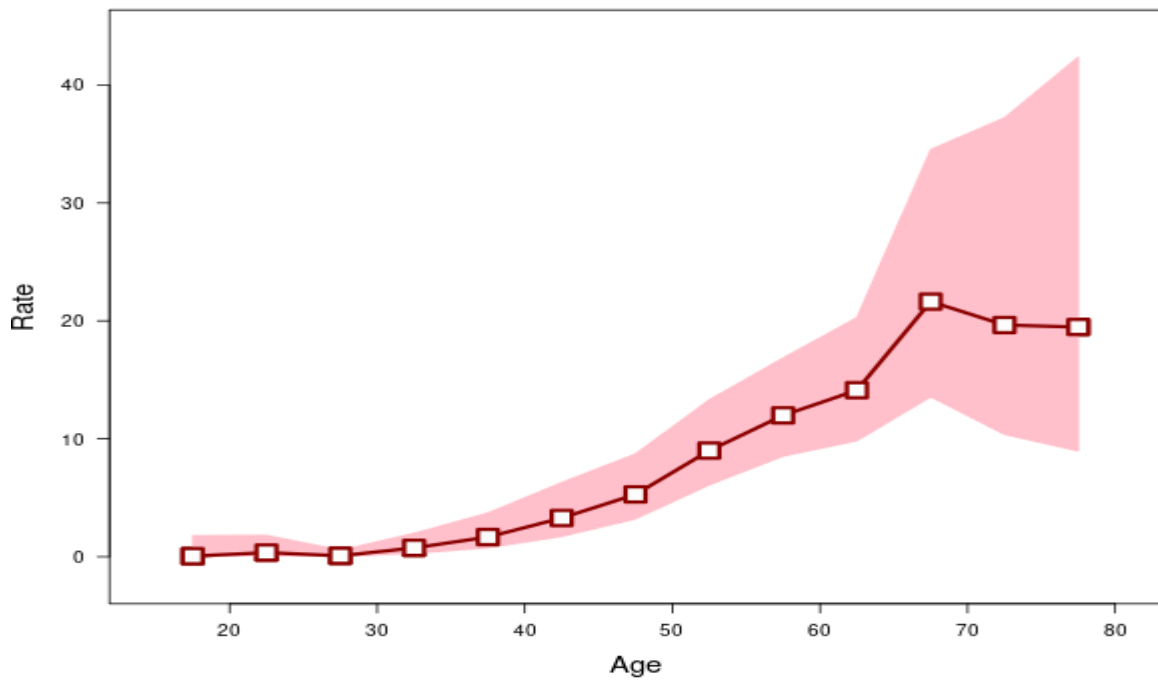

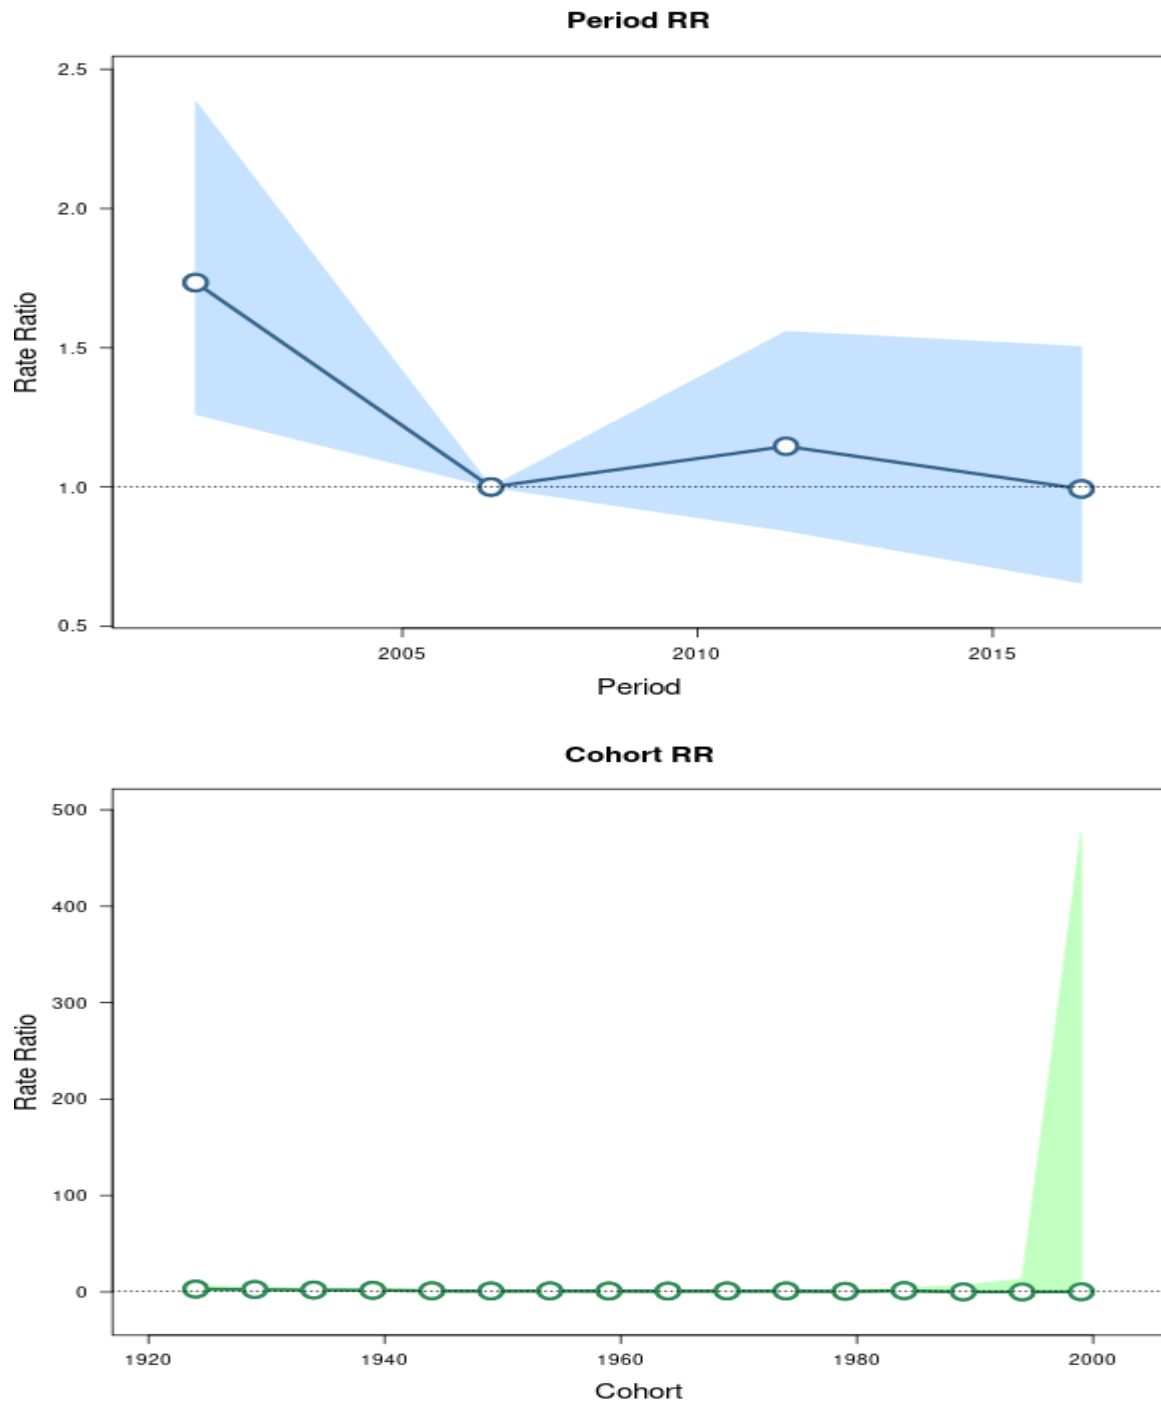

(E)

**Figure S5.** Age, period, and cohort effects of national (A); and ethnic trends of cervical cancer mortality in South Africa (1999–2018); Blacks (B), Whites (C), Coloureds (D), and Indians/Asians (E) (Local drift, fitted temporal trends, longitudinal age curve, cross sectional age curve, period effect, and cohort effect were depicted for each ethnic groups)

**Table S1. Trends in the mortality rate and mean age at death of Cervical cancer among ethnic groups in South Africa, 1999 - 2018.**

| Year | Black (n= 43,501)                          |               |       |       | White (n=1,836)                            |               |      |      | Coloured (n= 4,222)                        |               |       |       | Indian/Asian (n= 534)                      |               |      |      |
|------|--------------------------------------------|---------------|-------|-------|--------------------------------------------|---------------|------|------|--------------------------------------------|---------------|-------|-------|--------------------------------------------|---------------|------|------|
|      | Mortality (% of gynae & breast) ≥ 15 years | Age mean ± SD | CMR   | ASMR  | Mortality (% of gynae & breast) ≥ 15 years | Age mean ± SD | CMR  | ASMR | Mortality (% of gynae & breast) ≥ 15 years | Age mean ± SD | CMR   | ASMR  | Mortality (% of gynae & breast) ≥ 15 years | Age mean ± SD | CMR  | ASMR |
| 1999 | 1,336                                      | 55.86±13.92   | 11.65 | 11.41 | 68                                         | 62.06±16.46   | 3.75 | 2.06 | 170                                        | 55.96±14.21   | 12.30 | 10.93 | 29                                         | 56.59±16.30   | 6.88 | 5.67 |
| 2000 | 1,486                                      | 55.55±14.13   | 12.52 | 12.22 | 81                                         | 63.43±15.59   | 4.47 | 2.37 | 183                                        | 54.39±13.76   | 12.88 | 11.00 | 24                                         | 62.75±11.09   | 5.57 | 4.93 |
| 2001 | 1,480                                      | 55.99±13.79   | 11.86 | 10.87 | 75                                         | 58.96±16.35   | 4.14 | 2.31 | 174                                        | 55.18±13.25   | 11.91 | 10.24 | 26                                         | 56.96±13.25   | 5.90 | 4.56 |
| 2002 | 1,557                                      | 56.13±14.10   | 12.31 | 11.13 | 72                                         | 59.72±17.24   | 3.92 | 2.13 | 174                                        | 53.92±13.23   | 11.75 | 9.92  | 21                                         | 57.57±11.40   | 4.70 | 3.88 |
| 2003 | 1,671                                      | 56.67±14.50   | 12.66 | 11.41 | 75                                         | 55.71±16.41   | 4.14 | 2.39 | 198                                        | 55.20±14.19   | 12.90 | 10.78 | 23                                         | 57.57±13.45   | 5.02 | 3.94 |
| 2004 | 1,686                                      | 55.97±14.31   | 13.73 | 13.56 | 76                                         | 60.68±15.58   | 4.16 | 2.20 | 194                                        | 56.38±13.08   | 13.30 | 12.35 | 19                                         | 62.32±14.15   | 4.39 | 3.46 |
| 2005 | 1,814                                      | 56.58±14.34   | 14.55 | 13.41 | 75                                         | 58.75±14.32   | 4.10 | 2.14 | 199                                        | 55.41±12.58   | 13.17 | 11.13 | 21                                         | 55.43±13.03   | 4.71 | 3.33 |
| 2006 | 1,793                                      | 55.38±14.50   | 14.17 | 12.89 | 82                                         | 57.94±15.04   | 4.47 | 2.33 | 194                                        | 55.73±13.18   | 12.62 | 10.32 | 23                                         | 57.43±13.80   | 5.08 | 3.56 |
| 2007 | 1,733                                      | 55.79±14.65   | 13.50 | 12.16 | 77                                         | 59.21±16.65   | 4.18 | 2.17 | 178                                        | 54.53±13.06   | 11.39 | 9.05  | 21                                         | 57.95±11.43   | 4.57 | 3.23 |
| 2008 | 1,781                                      | 56.83±14.87   | 13.23 | 12.26 | 82                                         | 58.09±15.82   | 4.32 | 2.32 | 171                                        | 55.04±14.12   | 10.38 | 8.40  | 21                                         | 58.76±11.65   | 4.32 | 3.04 |
| 2009 | 1,943                                      | 56.19±15.03   | 14.18 | 13.05 | 78                                         | 59.35±15.34   | 4.27 | 2.30 | 204                                        | 55.03±13.11   | 12.21 | 9.66  | 29                                         | 58.31±10.36   | 5.80 | 3.95 |
| 2010 | 1,982                                      | 56.47±15.01   | 14.33 | 13.46 | 75                                         | 59.55±16.81   | 3.87 | 2.06 | 188                                        | 55.97±12.87   | 11.13 | 8.63  | 34                                         | 57.76±11.70   | 6.67 | 4.58 |
| 2011 | 2,287                                      | 56.13±14.92   | 16.26 | 14.41 | 87                                         | 58.75±17.12   | 4.50 | 2.41 | 234                                        | 54.79±13.62   | 13.54 | 10.25 | 28                                         | 59.46±13.95   | 5.53 | 3.76 |
| 2012 | 2,484                                      | 55.80±14.91   | 17.45 | 15.39 | 98                                         | 56.87±15.56   | 5.01 | 2.73 | 224                                        | 53.77±13.86   | 12.80 | 9.75  | 25                                         | 58.32±12.21   | 4.87 | 3.27 |
| 2013 | 2,656                                      | 55.46±14.93   | 17.50 | 14.73 | 105                                        | 55.51±15.85   | 5.36 | 3.01 | 226                                        | 57.60±14.43   | 12.46 | 9.49  | 31                                         | 60.97±12.70   | 5.99 | 4.06 |
| 2014 | 2,918                                      | 55.25±15.05   | 19.25 | 15.78 | 107                                        | 57.17±15.28   | 5.51 | 3.00 | 281                                        | 55.04±13.79   | 15.44 | 11.60 | 29                                         | 59.72±13.14   | 5.56 | 3.74 |
| 2015 | 3,059                                      | 55.24±15.08   | 19.74 | 16.71 | 112                                        | 58.37±14.08   | 5.76 | 3.05 | 259                                        | 55.75±13.96   | 13.94 | 10.05 | 30                                         | 57.67±12.25   | 5.65 | 3.65 |
| 2016 | 3,197                                      | 55.10±14.90   | 20.12 | 17.06 | 131                                        | 54.51±15.03   | 6.76 | 3.91 | 281                                        | 55.30±13.75   | 15.21 | 10.96 | 28                                         | 62.25±13.23   | 5.18 | 3.16 |
| 2017 | 3,291                                      | 55.21±14.76   | 20.33 | 17.09 | 143                                        | 56.70±15.24   | 7.36 | 3.90 | 238                                        | 56.38±13.61   | 12.69 | 8.75  | 31                                         | 55.58±15.68   | 5.59 | 3.33 |
| 2018 | 3,347                                      | 55.19±14.91   | 20.20 | 16.74 | 137                                        | 55.02±14.41   | 6.96 | 3.86 | 252                                        | 54.79±14.48   | 13.04 | 8.54  | 41                                         | 56.90±13.23   | 7.05 | 4.16 |

**Table S2. Join point estimates of the national and ethnic trends in age specific mortality rates for cervical cancers South Africa, 1999 – 2018**

| Cervix         | Trend segment | Lower Endpoint | Upper Endpoint | AAPC | Lower CI | Upper CI | Test Statistic~ | P-Value~ | Comment                                |
|----------------|---------------|----------------|----------------|------|----------|----------|-----------------|----------|----------------------------------------|
| <b>Overall</b> |               |                |                |      |          |          |                 |          |                                        |
| 15-19          | Full Range    | 1999           | 2018           | -1.1 | -5.1     | 3.2      | -0.5            | 0.6      | Non-Statistically significant decrease |
| 20-24          | 1             | 1999           | 2006           | 8.6  | -5.0     | 24.2     | 1.3             | 0.2      | Non-Statistically significant increase |
|                | 2             | 2006           | 2018           | -3.1 | -8.3     | 2.4      | -1.2            | 0.2      | Non-Statistically significant decrease |
|                | Full Range    | 1999           | 2018           | 0.2  | -2.6     | 3.1      | 0.2             | 0.9      | Stable                                 |
| 25-29          | 1             | 1999           | 2014           | 3.9* | 2.3      | 5.7      | 5.0             | 0.0      | Statistically significant increase     |
|                | 2             | 2014           | 2018           | -9.3 | -19.4    | 2.0      | -1.8            | 0.1      | Non-Statistically significant decrease |
|                | Full Range    | 1999           | 2018           | 2.2* | 0.7      | 3.6      | 3.2             | < 0.001  | Statistically significant increase     |
| 30-34          | 1             | 1999           | 2015           | 4.1* | 2.7      | 5.6      | 6.4             | < 0.001  | Statistically significant increase     |
|                | 2             | 2015           | 2018           | -2.5 | -16.6    | 13.9     | -0.3            | 0.7      | Non-Statistically significant decrease |
|                | Full Range    | 1999           | 2018           | 3.5* | 2.6      | 4.5      | 7.7             | < 0.001  | Statistically significant increase     |
| 35-39          | 1             | 1999           | 2006           | 2.6  | -1.5     | 7.0      | 1.4             | 0.2      | Non-Statistically significant increase |
|                | 2             | 2006           | 2009           | -3.3 | -29.8    | 33.2     | -0.2            | 0.8      | Non-Statistically significant decrease |
|                | 3             | 2009           | 2018           | 5.2* | 2.5      | 7.9      | 4.3             | < 0.001  | Statistically significant increase     |
|                | Full Range    | 1999           | 2018           | 2.6* | 1.6      | 3.5      | 5.8             | <0.001   | Non-Statistically significant increase |
| 40-44          | 1             | 1999           | 2007           | 3.5* | 1.4      | 5.7      | 3.6             | < 0.001  | Statistically significant increase     |
|                | 2             | 2007           | 2013           | -0.3 | -4.3     | 3.8      | -0.2            | 0.9      | Stable                                 |

|       |            |      |      |       |       |      |      |         |                                        |
|-------|------------|------|------|-------|-------|------|------|---------|----------------------------------------|
|       | 3          | 2013 | 2018 | 5.0*  | 1.1   | 9.1  | 2.8  | < 0.001 | Statistically significant increase     |
|       | Full Range | 1999 | 2018 | 2.1*  | 1.5   | 2.8  | 7.0  | < 0.001 | Statistically significant increase     |
| 45-49 | 1          | 1999 | 2001 | -4.6  | -24.7 | 20.8 | -0.4 | 0.7     | Non-Statistically significant decrease |
|       | 2          | 2001 | 2018 | 1.4*  | 0.6   | 2.2  | 3.8  | < 0.001 | Statistically significant increase     |
|       | Full Range | 1999 | 2018 | 1.2*  | 0.5   | 1.8  | 4.0  | < 0.001 | Statistically significant increase     |
| 50-54 | 1          | 1999 | 2013 | -0.1  | -1.0  | 0.9  | -0.2 | 0.9     | Stable                                 |
|       | 2          | 2013 | 2018 | 3.2   | -1.2  | 7.7  | 1.5  | 0.1     | Non-Statistically significant increase |
|       | Full Range | 1999 | 2018 | 0.5   | -0.1  | 1.2  | 1.9  | 0.1     | Stable                                 |
| 55-59 | 1          | 1999 | 2003 | 3.4   | -1.8  | 8.9  | 1.4  | 0.2     | Non-Statistically significant increase |
|       | 2          | 2003 | 2012 | -1.6  | -3.3  | 0.2  | -1.9 | 0.1     | Non-Statistically significant decrease |
|       | 3          | 2012 | 2018 | 3.1*  | 0.3   | 5.9  | 2.4  | < 0.001 | Statistically significant increase     |
|       | Full Range | 1999 | 2018 | 0.2   | -0.4  | 0.8  | 0.7  | 0.5     | Stable                                 |
| 60-64 | 1          | 1999 | 2004 | 3.2   | -0.0  | 6.5  | 2.2  | 0.1     | Non-Statistically significant increase |
|       | 2          | 2004 | 2007 | -6.6  | -19.1 | 7.8  | -1.0 | 0.3     | Non-Statistically significant decrease |
|       | 3          | 2007 | 2018 | 1.4*  | 0.5   | 2.4  | 3.2  | < 0.001 | Statistically significant increase     |
|       | Full Range | 1999 | 2018 | 0.0   | -0.6  | 0.6  | 0.1  | 0.9     | Stable                                 |
| 65-69 | 1          | 1999 | 2013 | -0.9  | -2.0  | 0.2  | -1.8 | 0.1     | Non-Statistically significant decrease |
|       | 2          | 2013 | 2018 | 2.4   | -3.1  | 8.1  | 0.9  | 0.4     | Non-Statistically significant decrease |
|       | Full Range | 1999 | 2018 | -0.3  | -1.0  | 0.4  | -0.9 | 0.4     | Stable                                 |
| 70-74 | 1          | 1999 | 2004 | 5.2*  | 0.3   | 10.4 | 2.2  | < 0.001 | Statistically significant increase     |
|       | 2          | 2004 | 2018 | -1.0* | -1.9  | -0.0 | -2.2 | < 0.001 | Statistically significant increase     |

|               |            |      |      |       |       |       |      |         |                                        |
|---------------|------------|------|------|-------|-------|-------|------|---------|----------------------------------------|
|               | Full Range | 1999 | 2018 | 0.1   | -0.9  | 1.0   | 0.2  | 0.9     | Stable                                 |
| 75+           | 1          | 1999 | 2005 | 13.0* | 7.9   | 18.3  | 5.6  | < 0.001 | Statistically significant increase     |
|               | 2          | 2005 | 2018 | -0.9  | -2.1  | 0.4   | -1.5 | 0.2     | Non-Statistically significant decrease |
|               | Full Range | 1999 | 2018 | 1.9*  | 0.4   | 3.4   | 2.6  | < 0.001 | Statistically significant increase     |
| <b>Blacks</b> |            |      |      |       |       |       |      |         |                                        |
| 15-19         | Full Range | 1999 | 2018 | 4.9*  | 0.3   | 9.7   | 2.2  | < 0.001 | Statistically significant increase     |
| 20-24         | 1          | 1999 | 2006 | 15.2* | 0.2   | 32.5  | 2.3  | < 0.001 | Statistically significant increase     |
|               | 2          | 2006 | 2011 | -13.9 | -34.5 | 13.2  | -1.2 | 0.2     | Non-Statistically significant decrease |
|               | 3          | 2011 | 2014 | 25.7  | -53.3 | 238.7 | 0.5  | 0.6     | Non-Statistically significant increase |
|               | 4          | 2014 | 2018 | -10.8 | -34.3 | 21.0  | -0.8 | 0.4     | Non-Statistically significant decrease |
|               | Full Range | 1999 | 2018 | 1.4   | -1.8  | 4.7   | 0.9  | 0.4     | Non-Statistically significant increase |
| 25-29         | 1          | 1999 | 2014 | 4.7*  | 2.1   | 7.4   | 3.9  | <0.001  | Statistically significant increase     |
|               | 2          | 2014 | 2018 | -7.2  | -22.0 | 10.4  | -0.9 | 0.4     | Non-Statistically significant decrease |
|               | Full Range | 1999 | 2018 | 3.0*  | 1.2   | 4.9   | 3.5  | <0.001  | Statistically significant increase     |
| 30-34         | 1          | 1999 | 2015 | 5.9*  | 4.3   | 7.5   | 8.0  | <0.001  | Statistically significant increase     |
|               | 2          | 2015 | 2018 | -3.6  | -18.4 | 13.8  | -0.5 | 0.6     | Non-Statistically significant decrease |
|               | Full Range | 1999 | 2018 | 5.0*  | 3.8   | 6.2   | 8.9  | <0.001  | Statistically significant increase     |
| 35-39         | 1          | 1999 | 2006 | 3.9   | -1.6  | 9.7   | 1.6  | 0.1     | Non-Statistically significant increase |
|               | 2          | 2006 | 2009 | -6.4  | -38.6 | 42.7  | -0.4 | 0.7     | Non-Statistically significant decrease |

|       |            |      |      |       |       |      |      |        |                                        |
|-------|------------|------|------|-------|-------|------|------|--------|----------------------------------------|
|       | 3          | 2009 | 2014 | 13.2* | 0.4   | 27.7 | 2.3  | <0.001 | Statistically significant increase     |
|       | 4          | 2014 | 2018 | -0.1  | -9.3  | 10.1 | -0.0 | 1.0    | Non-Statistically significant decrease |
|       | Full Range | 1999 | 2018 | 4.1*  | 3.0   | 5.3  | 7.5  | <0.001 | Statistically significant increase     |
| 40-44 | 1          | 1999 | 2006 | 4.8*  | 0.5   | 9.3  | 2.4  | <0.001 | Statistically significant increase     |
|       | 2          | 2006 | 2018 | 3.5*  | 1.9   | 5.1  | 4.7  | <0.001 | Statistically significant increase     |
|       | Full Range | 1999 | 2018 | 3.8*  | 3.1   | 4.6  | 10.5 | <0.001 | Statistically significant increase     |
| 45-49 | 1          | 1999 | 2008 | 1.1   | -1.5  | 3.9  | 0.9  | 0.4    | Non-Statistically significant increase |
|       | 2          | 2008 | 2018 | 4.0*  | 1.9   | 6.1  | 4.1  | <0.001 | Statistically significant increase     |
|       | Full Range | 1999 | 2018 | 2.7*  | 2.0   | 3.5  | 7.4  | <0.001 | Statistically significant increase     |
| 50-54 | 1          | 1999 | 2008 | 0.5   | -2.6  | 3.7  | 0.3  | 0.7    | Stable                                 |
|       | 2          | 2008 | 2018 | 4.0*  | 1.5   | 6.5  | 3.4  | <0.001 | Statistically significant increase     |
|       | Full Range | 1999 | 2018 | 2.4*  | 1.5   | 3.4  | 5.7  | <0.001 | Statistically significant increase     |
| 55-59 | 1          | 1999 | 2003 | 3.8   | -1.6  | 9.5  | 1.5  | 0.2    | Non-Statistically significant increase |
|       | 2          | 2003 | 2008 | -2.6  | -7.6  | 2.7  | -1.1 | 0.3    | Non-Statistically significant decrease |
|       | 3          | 2008 | 2018 | 3.7*  | 2.4   | 4.9  | 6.5  | <0.001 | Statistically significant increase     |
|       | Full Range | 1999 | 2018 | 1.6*  | 0.9   | 2.3  | 4.9  | <0.001 | Statistically significant increase     |
| 60-64 | 1          | 1999 | 2004 | 4.1   | -1.7  | 10.2 | 1.5  | 0.2    | Non-Statistically significant increase |
|       | 2          | 2004 | 2007 | -5.2  | -25.9 | 21.4 | -0.5 | 0.6    | Non-Statistically significant decrease |
|       | 3          | 2007 | 2018 | 3.1*  | 1.5   | 4.8  | 4.2  | <0.001 | Statistically significant increase     |



|                     |            |      |      |        |       |       |                         |         |                                        |
|---------------------|------------|------|------|--------|-------|-------|-------------------------|---------|----------------------------------------|
|                     | Full Range | 1999 | 2018 | 1.6*   | 0.8   | 2.3   | 4.3                     | <0.001  | Statistically significant increase     |
| 65-69               | Full Range | 1999 | 2018 | 1.4*   | 0.5   | 2.3   | 3.3                     | <0.001  | Statistically significant increase     |
| 70-74               | 1          | 1999 | 2004 | 7.4    | -1.5  | 17.1  | 1.8                     | 0.1     | Non-Statistically significant increase |
|                     | 2          | 2004 | 2018 | 1.6*   | 0.1   | 3.1   | 2.2                     | < 0.001 | Statistically significant increase     |
|                     | Full Range | 1999 | 2018 | 2.5*   | 1.3   | 3.7   | 4.4                     | <0.001  | Statistically significant increase     |
| 75+                 | 1          | 1999 | 2001 | -18.4  | -43.4 | 17.6  | -1.2                    | 0.3     | Non-Statistically significant decrease |
|                     | 2          | 2001 | 2018 | 2.9*   | 1.5   | 4.3   | 4.4                     | <0.001  | Statistically significant increase     |
|                     | Full Range | 1999 | 2018 | 1.8*   | 0.2   | 3.3   | 2.4                     | <0.001  | Statistically significant increase     |
| <b>Indian/Asian</b> |            |      |      |        |       |       |                         |         |                                        |
| 15-19               | 0          |      |      |        |       |       |                         |         |                                        |
| 20-24               | Full Range | 1999 | 2018 | -5.6   | -16.0 | 6.0   | -1.0                    | 0.3     | Non-Statistically significant decrease |
| 25-29               | 1          | 1999 | 2013 | 116.4* | 116.4 | 116.4 | 8.3 x 10 <sup>14</sup>  | <0.001  | Statistically significant increase     |
|                     | 2          | 2013 | 2018 | -86.9* | -86.9 | -86.9 | -4.6 x 10 <sup>14</sup> | <0.001  | Statistically significant decrease     |
|                     | Full Range | 1999 | 2018 | 86.8*  | 27.5  | 173.8 | 3.4                     | <0.001  | Statistically significant increase     |
| 30-34               | 1          | 1999 | 2005 | -23.8* | -34.7 | -11.1 | -3.8                    | <0.001  | Statistically significant decrease     |
|                     | 2          | 2005 | 2018 | 8.6*   | 1.8   | 15.7  | 2.7                     | <0.001  | Statistically significant increase     |
|                     | Full Range | 1999 | 2018 | -2.8   | -6.4  | 0.9   | -1.6                    | 0.1     | Non-Statistically significant decrease |
| 35-39               | 1          | 1999 | 2005 | 14.5   | -46.4 | 144.4 | 0.4                     | 0.7     | Non-Statistically significant increase |
|                     | 2          | 2005 | 2018 | -9.1*  | -15.5 | -2.3  | -2.8                    | <0.001  | Statistically significant decrease     |

|       |            |      |      |        |       |        |      |        |                                        |
|-------|------------|------|------|--------|-------|--------|------|--------|----------------------------------------|
|       | Full Range | 1999 | 2018 | -4.6   | -9.2  | 0.2    | -2.0 | 0.1    | Non-Statistically significant decrease |
| 40-44 | 1          | 1999 | 2002 | 71.2   | -74.1 | 1033.1 | 0.6  | 0.6    | Non-Statistically significant increase |
|       | 2          | 2002 | 2018 | 0.2    | -4.3  | 5.0    | 0.1  | 0.9    | Stable                                 |
|       | Full Range | 1999 | 2018 | 1.5    | -2.4  | 5.4    | 0.8  | 0.4    | Non-Statistically significant increase |
| 45-49 | 1          | 1999 | 2015 | 0.4    | -4.9  | 6.0    | 0.1  | 0.9    | Stable                                 |
|       | 2          | 2015 | 2018 | -26.5  | -67.3 | 65.3   | -0.8 | 0.4    | Non-Statistically significant decrease |
|       | Full Range | 1999 | 2018 | -1.4   | -5.1  | 2.5    | -0.8 | 0.5    | Non-Statistically significant decrease |
| 50-54 | Full Range | 1999 | 2018 | 2.6    | -1.2  | 6.6    | 1.4  | 0.2    | Non-Statistically significant increase |
| 55-59 | 1          | 1999 | 2001 | 4.1    | -55.4 | 143.0  | 0.1  | 0.9    | Non-Statistically significant increase |
|       | 2          | 2001 | 2004 | -35.2  | -79.6 | 106.5  | -0.8 | 0.4    | Non-Statistically significant decrease |
|       | 3          | 2004 | 2009 | 32.0   | -7.7  | 88.8   | 1.8  | 0.1    | Non-Statistically significant increase |
|       | 4          | 2009 | 2018 | -10.4* | -19.5 | -0.3   | -2.3 | <0.001 | Statistically significant decrease     |
|       | Full Range | 1999 | 2018 | -1.9   | -5.5  | 1.9    | -1.0 | 0.3    | Non-Statistically significant decrease |
|       | Full Range | 1999 | 2018 | -0.6   | -3.2  | 2.1    | -0.5 | 0.7    | Non-Statistically significant decrease |
| 65-69 | 1          | 1999 | 2006 | -14.8* | -26.3 | -1.6   | -2.4 | <0.001 | Statistically significant decrease     |
|       | 2          | 2006 | 2018 | 3.4    | -3.8  | 11.2   | 1.0  | 0.3    | Non-Statistically significant increase |
|       | Full Range | 1999 | 2018 | -3.4*  | -6.5  | -0.3   | -2.3 | <0.001 | Statistically significant decrease     |
| 70-74 | Full Range | 1999 | 2018 | -6.4*  | -10.1 | -2.5   | -3.4 | <0.001 | Statistically significant decrease     |
| 75+   | 1          | 1999 | 2008 | -8.6   | -18.4 | 2.4    | -1.7 | 0.1    | Non-Statistically significant decrease |

|                 |            |      |      |        |       |       |      |                        |                                        |
|-----------------|------------|------|------|--------|-------|-------|------|------------------------|----------------------------------------|
|                 | 2          | 2008 | 2018 | 4.3    | -6.4  | 16.2  | 0.8  | 0.4                    | Non-Statistically significant increase |
|                 | Full Range | 1999 | 2018 | -2.3   | -5.6  | 1.2   | -1.4 | 0.2                    | Non-Statistically significant decrease |
| <b>Coloured</b> |            |      |      |        |       |       |      |                        |                                        |
| 15-19           | 1          | 1999 | 2003 | -87.2  | -98.5 | 7.0   | -2.1 | 0.1                    | Non-Statistically significant decrease |
|                 | 2          | 2003 | 2018 | 0.0    | -26.7 | 36.4  | 0.0  | 2.0 x 10 <sup>30</sup> | Stable                                 |
|                 | Full Range | 1999 | 2018 | -38.9* | -47.7 | -28.7 | -6.7 | < 0.001                | Statistically significant decrease     |
| 20-24           | 1          | 1999 | 2012 | 6.9    | -1.4  | 15.8  | 1.8  | 0.1                    | Non-Statistically significant increase |
|                 | 2          | 2012 | 2018 | -17.8* | -31.1 | -1.9  | -2.4 | <0.001                 | Statistically significant decrease     |
|                 | Full Range | 1999 | 2018 | 0.0    | -5.5  | 5.9   | 0.0  | 1.0                    | Stable                                 |
| 25-29           | 1          | 1999 | 2012 | 9.8*   | 1.7   | 18.6  | 2.6  | <0.001                 | Statistically significant increase     |
|                 | 2          | 2012 | 2018 | -6.2   | -22.9 | 14.1  | -0.7 | 0.5                    | Non-Statistically significant decrease |
|                 | Full Range | 1999 | 2018 | 5.2*   | 0.8   | 9.8   | 2.5  | <0.001                 | Statistically significant increase     |
| 30-34           | 1          | 1999 | 2001 | -16.0  | -77.6 | 215.4 | -0.3 | 0.8                    | Non-Statistically significant decrease |
|                 | 2          | 2001 | 2018 | 4.5*   | 0.3   | 9.0   | 2.3  | <0.001                 | Statistically significant increase     |
|                 | Full Range | 1999 | 2018 | 3.6*   | 0.5   | 6.8   | 2.4  | <0.001                 | Statistically significant increase     |
| 35-39           | 1          | 1999 | 2002 | 10.3   | -26.6 | 65.9  | 0.5  | 0.6                    | Non-Statistically significant increase |
|                 | 2          | 2002 | 2008 | -8.8   | -24.4 | 9.9   | -1.1 | 0.3                    | Non-Statistically significant decrease |
|                 | 3          | 2008 | 2018 | 7.5*   | 1.2   | 14.1  | 2.6  | <0.001                 | Statistically significant increase     |
|                 | Full Range | 1999 | 2018 | 1.3    | -0.9  | 3.6   | 1.2  | 0.2                    | Non-Statistically significant increase |
| 40-44           | 1          | 1999 | 2001 | 5.2    | -42.1 | 91.4  | 0.2  | 0.9                    | Non-Statistically significant increase |

|       |            |      |      |       |       |      |      |        |                                        |
|-------|------------|------|------|-------|-------|------|------|--------|----------------------------------------|
|       | 2          | 2001 | 2007 | -4.6  | -17.5 | 10.2 | -0.7 | 0.5    | Non-Statistically significant decrease |
|       | 3          | 2007 | 2010 | -9.1  | -54.0 | 79.5 | -0.3 | 0.8    | Non-Statistically significant decrease |
|       | 4          | 2010 | 2018 | 7.4*  | 0.2   | 15.1 | 2.3  | <0.001 | Statistically significant increase     |
|       | Full Range | 1999 | 2018 | -0.7  | -2.7  | 1.3  | -0.7 | 0.5    | Non-Statistically significant decrease |
| 45-49 | 1          | 1999 | 2016 | 0.4   | -1.9  | 2.7  | 0.4  | 0.7    | Non-Statistically significant increase |
|       | 2          | 2016 | 2018 | -22.3 | -64.0 | 67.6 | -0.7 | 0.5    | Non-Statistically significant decrease |
|       | Full Range | 1999 | 2018 | -0.4  | -2.2  | 1.5  | -0.4 | 0.7    | Stable                                 |
| 50-54 | 1          | 1999 | 2005 | 0.2   | -5.6  | 6.4  | 0.1  | 0.9    | Stable                                 |
|       | 2          | 2005 | 2018 | -2.4* | -4.3  | -0.5 | -2.6 | <0.001 | Statistically significant increase     |
|       | Full Range | 1999 | 2018 | -1.7* | -2.7  | -0.7 | -3.6 | <0.001 | Statistically significant increase     |
| 55-59 | 1          | 1999 | 2001 | 10.0  | -28.1 | 68.2 | 0.5  | 0.6    | Non-Statistically significant increase |
|       | 2          | 2001 | 2018 | -1.0  | -2.5  | 0.4  | -1.5 | 0.1    | Non-Statistically significant decrease |
|       | Full Range | 1999 | 2018 | -0.6  | -1.7  | 0.5  | -1.2 | 0.3    | Non-Statistically significant decrease |
| 60-64 | Full Range | 1999 | 2018 | -0.7  | -2.7  | 1.3  | -0.8 | 0.4    | Non-Statistically significant decrease |
| 65-69 | Full Range | 1999 | 2018 | -1.5  | -3.2  | 0.2  | -1.9 | 0.1    | Non-Statistically significant decrease |
| 70-74 | Full Range | 1999 | 2018 | -2.1* | -4.1  | -0.1 | -2.2 | <0.001 | Statistically significant decrease     |
| 75+   | 1          | 1999 | 2004 | 7.7   | -2.9  | 19.5 | 1.6  | 0.1    | Non-Statistically significant increase |
|       | 2          | 2004 | 2009 | -9.9  | -23.4 | 6.0  | -1.5 | 0.2    | Non-Statistically significant decrease |
|       | 3          | 2009 | 2014 | 14.7  | -0.8  | 32.5 | 2.1  | 0.1    | Non-Statistically significant increase |

|              |            |      |      |        |       |       |      |        |                                        |
|--------------|------------|------|------|--------|-------|-------|------|--------|----------------------------------------|
|              | 4          | 2014 | 2018 | -16.4* | -29.0 | -1.5  | -2.5 | <0.001 | Statistically significant decrease     |
|              | Full Range | 1999 | 2018 | 0.2    | -1.7  | 2.3   | 0.3  | 0.8    | Stable                                 |
| <b>White</b> |            |      |      |        |       |       |      |        |                                        |
| 15-19        | -          | -    | -    |        |       |       |      |        |                                        |
| 20-24        | Full Range | 1999 | 2018 | -1.4   | -6.0  | 3.3   | -0.6 | 0.5    | Non-Statistically significant decrease |
| 25-29        | Full Range | 1999 | 2018 | 0.2    | -4.3  | 4.9   | 0.1  | 0.9    | Stable                                 |
| 30-34        | Full Range | 1999 | 2018 | 7.2*   | 2.5   | 12.1  | 3.3  | <0.001 | Statistically significant increase     |
| 35-39        | Full Range | 1999 | 2018 | 6.1*   | 2.7   | 9.5   | 3.8  | <0.001 | Statistically significant increase     |
| 40-44        | Full Range | 1999 | 2018 | 6.6*   | 3.8   | 9.5   | 5.0  | <0.001 | Statistically significant increase     |
| 45-49        | Full Range | 1999 | 2018 | 5.2*   | 2.9   | 7.6   | 4.7  | <0.001 | Statistically significant increase     |
| 50-54        | 1          | 1999 | 2010 | 0.9    | -3.5  | 5.5   | 0.4  | 0.7    | Non-Statistically significant decrease |
|              | 2          | 2010 | 2018 | 10.9*  | 5.1   | 17.1  | 4.1  | <0.001 | Statistically significant increase     |
|              | Full Range | 1999 | 2018 | 5.3*   | 3.2   | 7.3   | 5.5  | <0.001 | Statistically significant increase     |
| 55-59        | 1          | 1999 | 2001 | 62.7   | -42.7 | 361.5 | 1.0  | 0.3    | Non-Statistically significant increase |
|              | 2          | 2001 | 2014 | -3.5   | -7.9  | 1.1   | -1.6 | 0.1    | Non-Statistically significant decrease |
|              | 3          | 2014 | 2018 | 27.0*  | 1.7   | 58.5  | 2.3  | <0.001 | Statistically significant increase     |
|              | Full Range | 1999 | 2018 | 2.4    | -0.3  | 5.2   | 1.9  | 0.1    | Non-Statistically significant increase |
| 60-64        | Full Range | 1999 | 2018 | 1.1    | -1.5  | 3.7   | 0.9  | 0.4    | Non-Statistically significant increase |
| 65-69        | 1          | 1999 | 2002 | -18.0  | -35.8 | 4.9   | -1.8 | 0.1    | Non-Statistically significant decrease |
|              | 2          | 2002 | 2005 | 11.3   | -33.7 | 86.8  | 0.5  | 0.7    | Non-Statistically significant increase |

|       |            |      |      |       |       |      |      |        |                                        |
|-------|------------|------|------|-------|-------|------|------|--------|----------------------------------------|
|       | 3          | 2005 | 2009 | -16.6 | -38.6 | 13.3 | -1.3 | 0.2    | Non-Statistically significant decrease |
|       | 4          | 2009 | 2018 | 7.7*  | 1.6   | 14.1 | 2.9  | <0.001 | Statistically significant increase     |
|       | Full Range | 1999 | 2018 | -1.9  | -4.2  | 0.6  | -1.6 | 0.1    | Non-Statistically significant decrease |
| 70-74 | Full Range | 1999 | 2018 | -0.5  | -2.9  | 2.0  | -0.4 | 0.7    | Stable                                 |
| 75+   | Full Range | 1999 | 2018 | -2.1* | -3.8  | -0.3 | -2.5 | <0.001 | Non-Statistically significant decrease |

Table S3 The overall and ethnic age specific mortality rates of cervical cancers and in South Africa, 2018

| Age (Year)             | 15-19 | 20-24 | 25-29 | 30-34 | 35-39 | 40-44 | 45-49 | 50-54 | 55-59 | 60-64 | 65-69 | 70-74 | ≥75   |
|------------------------|-------|-------|-------|-------|-------|-------|-------|-------|-------|-------|-------|-------|-------|
| <b>Cervical cancer</b> |       |       |       |       |       |       |       |       |       |       |       |       |       |
| Overall                | 0.17  | 0.44  | 1.76  | 7.36  | 17.08 | 25.27 | 33.08 | 37.45 | 40.96 | 44.22 | 45.53 | 53.94 | 59.76 |
| Black                  | 0.20  | 0.42  | 1.76  | 7.43  | 17.91 | 26.48 | 39.24 | 40.74 | 47.09 | 52.98 | 58.94 | 75.70 | 87.90 |
| White                  | 0.00  | 0.00  | 0.75  | 4.70  | 6.07  | 11.86 | 8.08  | 14.76 | 13.10 | 6.64  | 5.61  | 4.94  | 8.24  |
| Indians/Asians         | 0.00  | 0.00  | 0.00  | 3.23  | 3.42  | 6.44  | 4.14  | 19.87 | 7.37  | 17.07 | 27.10 | 0.00  | 17.22 |
| Coloured               | 0.00  | 0.47  | 2.32  | 4.91  | 11.82 | 19.80 | 13.54 | 26.59 | 27.48 | 23.27 | 20.88 | 28.07 | 38.12 |

Table S4. Age Period Cohort effect estimates of trends in Cervical cancer mortality in South Africa, 1999-2018.

| Factor | Overall                                              |       |                                       |       |                   |       |
|--------|------------------------------------------------------|-------|---------------------------------------|-------|-------------------|-------|
|        | Longitudinal<br>RR(adjusted<br>for period<br>effect) | 95%CI | Cross<br>sectional<br>RR<br>(Adjusted | 95%CI | Local<br>drift(%) | 95%CI |

|                      |            |             |                       |             |       |                |
|----------------------|------------|-------------|-----------------------|-------------|-------|----------------|
|                      |            |             | for cohort<br>effect) |             |       |                |
| <b>Age</b>           |            |             |                       |             |       |                |
| 15-19                | 0.03       | 0.01-0.05   | 0.05                  | 0.03-0.09   | 2.05  | -4.68 to 9.26  |
| 20-24                | 0.22       | 0.17-0.28   | 0.39                  | 0.31-0.48   | -0.14 | -2.78 to 2.57  |
| 25-29                | 1.07       | 0.93-1.22   | 1.79                  | 1.58-2.03   | 2.63  | 1.37 - 3.89    |
| 30-34                | 3.64       | 3.31-4.00   | 5.65                  | 5.15-6.21   | 4.33  | 3.57 - 5.10    |
| 35-39                | 9.67       | 9.01-10.39  | 13.94                 | 12.90-15.07 | 3.74  | 3.18 - 4.31    |
| 40-44                | 18.50      | 17.52-19.54 | 24.72                 | 23.16-26.39 | 2.00  | 1.54 - 2.47    |
| 45-49                | 27.09      | 25.85-28.39 | 33.57                 | 31.75-35.49 | 1.34  | 0.91 - 1.77    |
| 50-54                | 33.92      | 32.44-35.48 | 38.98                 | 37.11-40.94 | 0.75  | 0.34 - 1.17    |
| 55-59                | 40.32      | 38.48-42.26 | 42.96                 | 40.99-45.03 | 0.31  | -0.12 to 0.74  |
| 60-64                | 43.38      | 40.81-46.12 | 42.86                 | 40.80-45.02 | -0.06 | -0.50 to 0.38  |
| 65-69                | 48.53      | 45.25-52.04 | 44.45                 | 41.99-47.06 | -0.48 | -0.95 to -0.01 |
| 70-74                | 53.41      | 49.31-57.85 | 45.37                 | 42.26-48.71 | -0.19 | -0.69 to 0.32  |
| 75+                  | 70.00      | 64.42-76.06 | 55.13                 | 50.87-59.76 | 2.87  | 2.26 - 3.48    |
| <b>Net Drift (%)</b> |            |             |                       |             | 1.52  | 1.16 - 1.89    |
| <b>Period</b>        | Rate Ratio |             |                       |             |       |                |
| 1999-2003            | 0.90       | 0.86-0.94   |                       |             |       |                |
| 2004-2008            | 1.00       | 1.00-1.00   |                       |             |       |                |
| 2009-2013            | 1.03       | 0.99-1.07   |                       |             |       |                |
| 2014- 2018           | 1.15       | 1.10-1.20   |                       |             |       |                |
| <b>Cohort</b>        | Rate Ratio |             |                       |             |       |                |
| 1924-1928            | 0.64       | 0.57-0.72   |                       |             |       |                |
| 1929-1933            | 0.97       | 0.88-1.07   |                       |             |       |                |
| 1934-1938            | 1.04       | 0.96-1.13   |                       |             |       |                |
| 1939-1943            | 1.01       | 0.94-1.09   |                       |             |       |                |
| 1944-1948            | 0.95       | 0.89-1.02   |                       |             |       |                |
| 1949-1953            | 0.98       | 0.93-1.04   |                       |             |       |                |
| 1954-1959            | 0.99       | 0.94-1.04   |                       |             |       |                |
| 1959-1963            | 1.00       | 1.00-1.00   |                       |             |       |                |

|            |      |           |  |  |  |  |
|------------|------|-----------|--|--|--|--|
| 1964-1968  | 1.11 | 1.05-1.17 |  |  |  |  |
| 1969-1973  | 1.19 | 1.12-1.26 |  |  |  |  |
| 1974-1978  | 1.36 | 1.27-1.46 |  |  |  |  |
| 1979-1983  | 1.96 | 1.79-2.14 |  |  |  |  |
| 1984-1988  | 2.14 | 1.89-2.42 |  |  |  |  |
| 1989-1993  | 2.03 | 1.66-2.49 |  |  |  |  |
| 1994 -1998 | 1.94 | 1.25-3.02 |  |  |  |  |
| 1999-2003  | 3.04 | 1.00-9.27 |  |  |  |  |

**Table S5. Age Period Cohort effect estimates of ethnic trends in cervical cancer mortality by ethnic groups in South Africa, 1999-2018.**

| Factor                                                | Black                                                     | White                                                 | Indian/Asian                                          | Coloured                                                  |
|-------------------------------------------------------|-----------------------------------------------------------|-------------------------------------------------------|-------------------------------------------------------|-----------------------------------------------------------|
| Longitudinal RR(adjusted for period effect) RR(95%CI) | Cross sectional RR (Adjusted for cohort effect) RR(95%CI) | Longitudinal RR(adjusted for period effect) RR(95%CI) | Longitudinal RR(adjusted for period effect) RR(95%CI) | Cross sectional RR (Adjusted for cohort effect) RR(95%CI) |



| Age   |                                    |                                |                               |                                       |                                    |                                  |                              |                                 |                                       |                                  |                                       |                               |
|-------|------------------------------------|--------------------------------|-------------------------------|---------------------------------------|------------------------------------|----------------------------------|------------------------------|---------------------------------|---------------------------------------|----------------------------------|---------------------------------------|-------------------------------|
| 15-19 | 0.011<br>(0.00<br>5-<br>0.025<br>) | 0.04(0<br>.02-<br>0.09)        | 4.49<br>(-<br>3.14to<br>2.72) | 0.0054<br>(0.000<br>1-<br>0.2872<br>) | 0.0143<br>(-<br>0.0004-<br>0.4612) | -7.31<br>(-<br>42.13to<br>48.45) | 0.166(0.0<br>02to12.73<br>8  | 0.052<br>(0.002t<br>o1.797<br>) | 10.41(0<br>-<br>44.22t<br>o43.87<br>) | 0.042(0<br>-<br>0.007-<br>0.271) | 0.044<br>(0.008<br>-<br>0.255)        | -11.75(-<br>40.61to<br>31.14) |
| 20-24 | 0.100<br>(0.07<br>4-<br>0.136<br>) | 0.33<br>(0.25-<br>0.42)        | 2.33 (-<br>0.74to<br>50)      | 0.07<br>(0.03-<br>0.17)               | 0.17<br>(0.06-<br>0.49)            | -10.12(-<br>32.86to<br>20.33)    | 0.99<br>(0.20to<br>4.81)     | 0.36<br>(0.07to<br>1.83)        | 15.45(0<br>-<br>38.70t<br>o16.60<br>) | 0.29(0.0<br>12-<br>0.73)         | 0.31(0<br>.13-<br>0.72)               | 0.61(-<br>7.40to<br>9.32)     |
| 25-29 | 0.58<br>(0.49-<br>0.68)            | 1.52(1<br>.31-<br>1.76)        | 4.38<br>(2.90to<br>5.87)      | 0.21<br>(0.11-<br>0.41)               | 0.44<br>(0.19-<br>1.00)            | 3.63 (-<br>2.37to<br>9.99)       | 0.19<br>(0.03to<br>1.38<br>) | 0.08<br>(0.01to<br>0.56)        | 10.87(0<br>-<br>30.15t<br>o13.74<br>) | 1.18(0.1<br>80-<br>1.77)         | 0.24(0<br>.78-<br>1.97)               | 4.48<br>(0.79to<br>8.31)      |
| 30-34 | 2.32<br>(2.08-<br>2.60)            | 4.97(4<br>.46-<br>5.54)        | 6.20<br>(5.30to<br>7.11)      | 0.64<br>(0.42-<br>0.96)               | 1.15<br>(0.61-<br>2.17)            | 7.66<br>(4.27to<br>11.15)        | 1.53(0.67<br>to3.51)         | 0.75<br>(0.28to<br>2.00)        | 0.67 (-<br>5.83to<br>7.62)            | -3.35(2.3<br>59-<br>4.32)        | 3.54(24.1<br>.46-<br>5.09)            | 1.9<br>7to6.44<br>)           |
| 35-39 | 6.37<br>(5.84-<br>6.95)            | 11.04(10.09-<br>12.09)         | 5.88<br>(5.21to<br>6.56)      | 1.78<br>(1.32-<br>2.40)               | 2.85<br>(1.72-<br>4.73)            | 6.06<br>(3.71to<br>8.46)         | 2.91<br>(1.59to<br>5.31)     | 1.67<br>(0.75to<br>3.72)        | -2.14<br>(-<br>7.29to<br>3.29)        | 8.33(6.8<br>92-<br>10.03)        | 8.87(6<br>.62-<br>11.88)              | 1.41(-<br>0.11to<br>2.95)     |
| 40-44 | 15.43<br>(14.4<br>2-<br>16.50<br>) | 21.70<br>(20.09<br>-<br>23.43) | 5.29<br>(4.72to<br>5.87)      | 3.99<br>(3.21-<br>4.97)               | 5.65<br>(3.83-<br>8.35)            | 5.20<br>(3.26to<br>7.16)         | 4.91<br>(3.09to<br>7.78)     | 3.29<br>(1.71to<br>6.30)        | 0.58 (-<br>3.24to<br>4.55)            | 15.70(13.44<br>-<br>17.92)       | 16.85<br>(13.44<br>-<br>21.11)        | -0.66 (-<br>1.83to<br>0.52)   |
| 45-49 | 26.68<br>(25.2<br>0-<br>28.24<br>) | 30.43(4.49(3.9<br>7to5.02<br>) | 4.74<br>(3.90-<br>5.76)       | 5.92<br>(4.42-<br>7.94)               | 5.22<br>(3.43to<br>7.03)           | 6.77<br>(4.67to<br>9.83)         | 5.29<br>(3.20to<br>8.73)     | -0.51<br>(-<br>3.78to<br>2.87)  | 22.74(24.58<br>-<br>25.55)            | 24.58(-<br>20.24-<br>29.12)      | -1.37 (-<br>20.75-<br>2.42to<br>0.30) |                               |

|               |                                                                                            |        |                    |       |            |                       |            |        |                       |        |  |                       |  |  |
|---------------|--------------------------------------------------------------------------------------------|--------|--------------------|-------|------------|-----------------------|------------|--------|-----------------------|--------|--|-----------------------|--|--|
| 50-54         | 37.88<br>(35.9 35.05( 3.69 6.91 7.63 4.19(2.4 9.89 9.00 -0.86 27.14( 29.56( -0.84(-        |        |                    |       |            |                       |            |        |                       |        |  |                       |  |  |
|               | 0- 33.02- (3.17to (5.76- (6.15- 5to5.97 (7.22to13 (6.09to 3.88to 24.31- 25.98- 1.87to0.    |        |                    |       |            |                       |            |        |                       |        |  |                       |  |  |
|               | 39.98 37.21) 4.21) 8.29) 9.47) ) .54) 13.32) 2.26) 30.30) 33.64) 19)                       |        |                    |       |            |                       |            |        |                       |        |  |                       |  |  |
| 55-59         | 55.08<br>(52.1 41.34( 3.25 8.54 8.33 2.44(0.6 11.29 11.99 -1.12 30.58( 33.56( -0.68 (-     |        |                    |       |            |                       |            |        |                       |        |  |                       |  |  |
|               | 6- 39.03- (2.72to (7.09- (6.88- 9to4.22 (7.97to15 (8.52to 3.95to 27.25- 29.64- 1.74to0.    |        |                    |       |            |                       |            |        |                       |        |  |                       |  |  |
|               | 58.17 43.78) 3.78) 10.27) 10.08) ) .99) 16.87) 1.78) 34.31) 38.00) 40)                     |        |                    |       |            |                       |            |        |                       |        |  |                       |  |  |
| 60-64         | 70.73<br>(65.7 43.05( 2.77 8.20 7.06 0.67 (- 11.40 14.12 -2.88 31.12( 34.41( -0.89 (-      |        |                    |       |            |                       |            |        |                       |        |  |                       |  |  |
|               | 6- 40.59- (2.23to (6.38- (5.54- 1.15to2.(7.42to17 (9.83to 5.65to 26.67- 29.48- 2.03to0.    |        |                    |       |            |                       |            |        |                       |        |  |                       |  |  |
|               | 76.07 45.66) 3.32) 10.53) 9.00) 53) .53) 20.29) 0.03) 36.31) 40.17) 27)                    |        |                    |       |            |                       |            |        |                       |        |  |                       |  |  |
| 65-69         | 92.88<br>(85.4 45.86( 2.89 7.06(5. 5.37 -1.11 (- 14.98 21.63 -4.56 35.03( 39.04( -1.29 (-  |        |                    |       |            |                       |            |        |                       |        |  |                       |  |  |
|               | 7- 42.89- (2.31to 24- (3.82- 3.07to0.(9.36to23 o34.54 7.39to- 29.30- 31.78- 2.54to-        |        |                    |       |            |                       |            |        |                       |        |  |                       |  |  |
|               | 100.9 49.04) 3.47) 9.51) 7.56) 90) .99) 34.54) 1.64) 41.90) 47.96) 0.03)                   |        |                    |       |            |                       |            |        |                       |        |  |                       |  |  |
| 70-74         | 120.1<br>3 48.11( 3.45 10.08 6.78 -1.87 (- 11.67 19.65 -4.47 34.34 38.56( -0.94(-          |        |                    |       |            |                       |            |        |                       |        |  |                       |  |  |
|               | (109. 44.29- (2.82to (7.32- (4.35- 3.72to0.(6.60to20 (10.37t (- (27.79 29.28- 2.36to0.     |        |                    |       |            |                       |            |        |                       |        |  |                       |  |  |
|               | 127- 52.25) 4.08) 13.88) 10.56) 02) .62) 37.23 7.79to- 42.44) 50.78) 50                    |        |                    |       |            |                       |            |        |                       |        |  |                       |  |  |
| 75+           | 208.3<br>9 67.69( 5.58 13.82 8.21 -1.19(- 9.92 19.48 -3.61 41.22( 46.64( -0.25(-           |        |                    |       |            |                       |            |        |                       |        |  |                       |  |  |
|               | (188. 61.70- (4.81to (9.93- (4.76- 2.91to0.(5.56to17 (8.95to 7.53to 33.00- 33.36- 1.89to1. |        |                    |       |            |                       |            |        |                       |        |  |                       |  |  |
|               | 85- 74.26) 6.36) 19.25) 14.16) 58) .71) 42.38) 0.48) 51.49) 65.21) 43)                     |        |                    |       |            |                       |            |        |                       |        |  |                       |  |  |
| Net Drift (%) |                                                                                            |        | 4.28 (3.84 - 4.71) |       |            | 2.51 (- 0.07 to 5.16) |            |        | -3.03(- 6.53 to 0.61) |        |  | -0.15(- 1.62 to 1.34) |  |  |
| Peri od       | Rate Ratio                                                                                 | 95%C I | Rate Ratio         | 95%CI | Rate Ratio | 95%C I                | Rate Ratio | 95%C I | Rate Ratio            | 95%C I |  |                       |  |  |

|                    |                       |                   |                       |               |                       |                   |                       |                   |
|--------------------|-----------------------|-------------------|-----------------------|---------------|-----------------------|-------------------|-----------------------|-------------------|
| 1999<br>-<br>2003  | 0.87                  | 0.83-<br>0.91     | 0.98                  | 0.81-<br>1.20 | 1.73                  | 1.26-<br>2.38     | 1.02                  | 0.91-<br>1.15     |
| 2004<br>-<br>2008  | 1.00                  | 1.00-<br>1.00     | 1.00                  | 1.00-<br>1.00 | 1.00                  | 1.00-<br>1.00     | 1.00                  | 1.00-<br>1.00     |
| 2009<br>-<br>2013  | 1.13                  | 1.08-<br>1.18     | 1.10                  | 0.91-<br>1.33 | 1.15                  | 0.84-<br>1.56     | 0.96                  | 0.86-<br>1.08     |
| 2014<br>-<br>2018  | 1.68                  | 1.60-<br>1.76     | 1.44                  | 1.10-<br>1.89 | 0.99                  | 0.66-<br>1.50     | 1.01                  | 0.86-<br>1.19     |
| <b>Coh<br/>ort</b> | <b>Rate<br/>Ratio</b> | <b>95%C<br/>I</b> | <b>Rate<br/>Ratio</b> | <b>95%CI</b>  | <b>Rate<br/>Ratio</b> | <b>95%C<br/>I</b> | <b>Rate<br/>Ratio</b> | <b>95%C<br/>I</b> |
| 1924<br>-<br>1928  | 0.25                  | 0.22-<br>0.29     | 0.93                  | 0.62-<br>1.37 | 2.96                  | 1.31-<br>6.72     | 1.22                  | 0.89-<br>1.67     |
| 1929<br>-<br>1933  | 0.37                  | 0.33-<br>0.41     | 0.94                  | 0.65-<br>1.36 | 2.53                  | 1.29-<br>4.96     | 1.26                  | 0.97-<br>1.64     |
| 1934<br>-<br>1938  | 0.47                  | 0.43-<br>0.52     | 0.85                  | 0.60-<br>1.21 | 2.02                  | 1.15-<br>3.52     | 1.28                  | 1.03-<br>1.60     |
| 1939<br>-<br>1943  | 0.57                  | 0.52-<br>0.62     | 0.79                  | 0.58-<br>1.07 | 1.73                  | 1.03-<br>2.91     | 1.16                  | 0.96-<br>1.41     |
| 1944<br>-<br>1948  | 0.61                  | 0.56-<br>0.66     | 0.71                  | 0.54-<br>0.93 | 1.24                  | 0.80-<br>1.95     | 1.11                  | 0.94-<br>1.31     |
| 1949<br>-<br>1953  | 0.74                  | 0.69-<br>0.80     | 0.73                  | 0.58-<br>0.93 | 1.03                  | 0.68-<br>1.57     | 1.05                  | 0.91-<br>1.21     |
| 1954<br>-<br>1959  | 0.84                  | 0.79-<br>0.89     | 0.87                  | 0.70-<br>1.07 | 1.13                  | 0.78-<br>1.64     | 1.02                  | 0.90-<br>1.16     |

|      |   |      |                |      |                      |      |                 |      |                 |
|------|---|------|----------------|------|----------------------|------|-----------------|------|-----------------|
| 1959 | - | 1.00 | 1.00-<br>1.00  | 1.00 | 1.00-<br>1.00        | 1.00 | 1.00-<br>1.00   | 1.00 | 1.00-<br>1.00   |
| 1963 | - | 1.28 | 1.20-<br>1.36  | 1.39 | 1.13-<br>1.71        | 0.93 | 0.62-<br>1.40   | 0.92 | 0.81-<br>1.04   |
| 1964 | - | 1.60 | 1.49-<br>1.72  | 1.82 | 1.43-<br>2.30        | 1.06 | 0.65-<br>1.74   | 0.84 | 0.72-<br>0.97   |
| 1969 | - | 2.19 | 2.01-<br>2.39  | 2.13 | 1.59-<br>2.84        | 1.05 | 0.58-<br>1.92   | 0.92 | 0.77-<br>1.11   |
| 1973 | - | 2.99 | 2.68-<br>3.32  | 3.51 | 2.40-<br>5.12        | 0.65 | 0.26-<br>1.61   | 1.12 | 0.87-<br>1.44   |
| 1974 | - | 3.94 | 3.41-<br>4.55  | 5.25 | 3.10-<br>8.92        | 1.40 | 0.46-<br>4.19   | 1.55 | 1.09-<br>2.21   |
| 1978 | - | 4.08 | 3.22-<br>5.17  | 3.36 | 1.28-<br>8.85        | 0.12 | 0.00-<br>6.84   | 1.72 | 0.96-<br>3.08   |
| 1979 | - | 4.33 | 2.62-<br>7.16  | 0.69 | 0.01-<br>87.84       | 0.09 | 0.00-<br>13.60  | 1.20 | 0.32-<br>4.53   |
| 1983 | - | 8.02 | 2.34-<br>27.52 | 2.52 | 0.00-<br>3957.5<br>3 | 0.25 | 0.00-<br>476.79 | 0.22 | 0.00-<br>158.88 |
| 1984 | - |      |                |      |                      |      |                 |      |                 |
| 1988 | - |      |                |      |                      |      |                 |      |                 |
| 1989 | - |      |                |      |                      |      |                 |      |                 |
| 1993 | - |      |                |      |                      |      |                 |      |                 |
| 1994 | - |      |                |      |                      |      |                 |      |                 |
| 1998 | - |      |                |      |                      |      |                 |      |                 |
| 1999 | - |      |                |      |                      |      |                 |      |                 |
| 2003 | - |      |                |      |                      |      |                 |      |                 |

Table S6. Wald Chi-square test for estimable functions of age period cohort model in the overall and ethnic trends of mortality of cervical cancers in South Africa (1999 – 2018).

| Gynaecological cancer type                  | NetDrift = 0 |           | All Period RR = 1 |            | All Cohort RR = 1 |            | All Local Drifts = Net Drift |           |
|---------------------------------------------|--------------|-----------|-------------------|------------|-------------------|------------|------------------------------|-----------|
|                                             | Chi-square   | P-value   | Chi-square        | P-value    | Chi-square        | P-value    | Chi-square                   | P-value   |
| <b>Cervix</b>                               |              |           |                   |            |                   |            |                              |           |
| Overall                                     | 66.99        | 2.72E-16* | 77.83             | 8.97E-17*  | 374.62            | 1.47E-70*  | 238.55                       | 1.52E-43* |
| Black                                       | 382.77       | 3.11E-85* | 596.65            | 5.36E-129* | 1100.05           | 4.72E-225* | 91.34                        | 7.73E-14* |
| White                                       | 3.65         | 0.056     | 11.26             | 0.01*      | 82.81             | 2.13E-11*  | 55.39                        | 3.45E-07* |
| Indian/Asian                                | 2.68         | 0.10      | 11.80             | 0.0081*    | 17.92             | 0.27       | 9.40                         | 0.74      |
| Coloured                                    | 0.040        | 0.84      | 1.81              | 0.61       | 27.58             | 0.02*      | 24.39                        | 0.03*     |
| *Statistically significant at P-value< 0.05 |              |           |                   |            |                   |            |                              |           |
